1 **CDK1 couples proliferation with protein synthesis**

2

3

4 Katharina Haneke<sup>1,2</sup>, Johanna Schott<sup>1,2</sup>, Doris Lindner<sup>1,2</sup>, Anne K. Hollensen<sup>3</sup>, Christian K.  
5 Damgaard<sup>3</sup>, Cyril Mongis<sup>2</sup>, Michael Knop<sup>2,4</sup>, Wilhelm Palm<sup>4</sup>, Alessia Ruggieri<sup>5</sup> and Georg  
6 Stoecklin<sup>1,2</sup>

7

8

9

10 <sup>1</sup>Division of Biochemistry, Center for Biomedicine and Medical Technology Mannheim  
11 (CBTM), Medical Faculty Mannheim, Heidelberg University, Mannheim, Germany

12 <sup>2</sup>Center for Molecular Biology of Heidelberg University (ZMBH), DKFZ-ZMBH Alliance,  
13 Heidelberg, Germany

14 <sup>3</sup>Department of Molecular Biology and Genetics, Aarhus University, Aarhus, Denmark

15 <sup>4</sup>German Cancer Research Center (DKFZ), DKFZ-ZMBH Alliance, Heidelberg, Germany

16 <sup>5</sup>Department of Infectious Diseases, Molecular Virology, Center for Integrative Infectious  
17 Diseases Research (CIID), University of Heidelberg, Heidelberg, Germany

18

19

20

21 Correspondence: Georg Stoecklin  
22 Medical Faculty Mannheim of Heidelberg University  
23 Ludolf-Krehl-Str. 13–17  
24 68176 Mannheim, Germany  
25 Tel. +49 (0)621 383 71444  
26 email: [georg.stoecklin@medma.uni-heidelberg.de](mailto:georg.stoecklin@medma.uni-heidelberg.de)

27

28 **ABSTRACT**

29

30 Cell proliferation exerts a high demand on protein synthesis, yet the mechanisms coupling  
31 the two processes are not fully understood. A kinase and phosphatase screen for  
32 activators of translation, based on the formation of stress granules in human cells,  
33 revealed cell cycle-associated kinases as major candidates. CDK1 was identified as a  
34 positive regulator of global translation, and cell synchronization experiments showed that  
35 this is an extra-mitotic function of CDK1. Dephosphorylation of eIF2 $\alpha$  and S6K1 signaling  
36 were found to act downstream of CDK1. Moreover, Ribo-Seq analysis uncovered that  
37 CDK1 exerts a particularly strong effect on the translation of 5'TOP mRNAs, which  
38 includes mRNAs encoding for ribosomal proteins and several translation factors. This  
39 effect requires the 5'TOP mRNA-binding protein LARP1, concurrent to our finding that  
40 LARP1 phosphorylation is strongly dependent on CDK1. Taken together, our results show  
41 that CDK1 provides a direct means to couple cell proliferation with biosynthesis of the  
42 translation machinery and the rate of protein synthesis.

43

## 44 INTRODUCTION

45

46 Cell growth, proliferation and progression through the cell cycle strongly depend on the  
47 synthesis of new proteins (Pardee, 1989; Polymenis and Aramayo, 2015). On the one  
48 hand, cells exert temporal control over the production of specific proteins during the  
49 different phases of the cell cycle (Aviner et al., 2013; Stumpf et al., 2013; Tanenbaum et  
50 al., 2015). On the other hand, cells also need to adjust the overall rate of protein synthesis  
51 to the proliferation rate in order to maintain cell size and functionality (Foster et al., 2010).  
52 It is therefore not surprising that modifications of the translation machinery can affect cell  
53 proliferation rates, and that deregulation of protein synthesis is increasingly recognized as  
54 a major driver of cell transformation (Ruggero and Pandolfi, 2003; Silvera et al., 2010;  
55 Truitt and Ruggero, 2016)

56 A few signaling pathways are known to regulate protein synthesis in response to  
57 proliferative cues. The mechanistic target of rapamycin complex 1 (mTORC1), e.g.,  
58 functions as a signaling node that adjusts protein synthesis to cell growth rates and the  
59 metabolic status of the cell (Laplante and Sabatini, 2012). mTORC1 directly  
60 phosphorylates 4E-BPs, thereby promoting the translation of a distinct group of mRNAs  
61 that strongly depend on the eukaryotic translation initiation factor (eIF) 4E (Gandin et al.,  
62 2016; Nandagopal and Roux, 2015). mTORC1 further enhances the translation of mRNAs  
63 containing a 5' terminal oligo pyrimidine tract (5'TOP) motif, which includes many mRNAs  
64 encoding ribosomal proteins and translation factors (Meyuhas and Kahan, 2015).

65 The protooncogenes Ras and Myc also control protein synthesis in order to  
66 coordinate cellular growth rates with extracellular growth stimuli. While Myc mostly  
67 controls translation through transcriptional upregulation of ribosomal components and  
68 translation factors (van Riggelen et al., 2010), the Ras/Erk signaling pathway shares some  
69 common downstream signals with mTORC1 including phosphorylation of ribosomal  
70 protein S6 (RPS6) (Roux and Topisirovic, 2018).

71 While numerous translation factors are known to be phosphorylated (Roux and  
72 Topisirovic, 2018), the regulatory impact of phosphorylation is established only for a few  
73 factors such as eIF2 $\alpha$ , 4E-BPs and eEF2 (Jackson et al., 2010; Kenney et al., 2014).  
74 Ribosomal proteins are also known to carry various posttranslational modifications (Shi  
75 and Barna, 2015), yet the role of these modifications in controlling protein synthesis is  
76 poorly understood. Recently, a systematic approach to identify translationally relevant  
77 phosphorylation sites on ribosomal proteins revealed that phosphorylation of RPL12  
78 controls the translation of mitosis-specific proteins (Imami et al., 2018).

79           At the core of the cell cycle, cyclin-dependent kinases (CDKs) drive cells through  
80 the different phases of the cell cycle. In G1, Cyclin D-CDK4/6 (early) and Cyclin E-CDK2  
81 (late) prepare entry into S-phase, where Cyclin A-CDK2 takes over and orchestrates  
82 replication, followed by activation of Cyclin A/B-CDK1 promoting passage through G2 and  
83 entry into M-phase (Malumbres and Barbacid, 2005). Interestingly, CDK1 can substitute  
84 for the other CDKs and was found to be sufficient for driving the mammalian cell cycle  
85 (Santamaria et al., 2007). CDK1 has also been linked to the control of protein synthesis  
86 during M-phase (Shuda et al., 2015; Sivan et al., 2011)

87           In this study, we made use of the fact that a global decrease in translation initiation  
88 is coupled to the assembly of cytoplasmic stress granules (SGs), aggregates that arise  
89 through phase separation of stalled mRNAs and associated factors from the surrounding  
90 cytosol (Kedersha et al., 2013). To identify novel regulators of protein synthesis, we  
91 conducted an siRNA screen against all human kinases and phosphatases using SG  
92 formation as a visual read-out. Since cell cycle-associated kinases were among the  
93 primary candidates identified by the screen, we chose to pursue CDK1 and characterize  
94 its role in protein synthesis. Our results demonstrate that CDK1 acts outside of mitosis as  
95 a general activator of translation that allows direct adaptation of protein synthesis to the  
96 rate of cell proliferation.

97

## 98 **RESULTS**

### 99 **Identification of kinases and phosphatases suppressing SG assembly**

100 With the aim to identify kinases and phosphatases that enhance global protein synthesis  
101 under regular growth conditions, we knocked down 711 human kinases and 256  
102 phosphatases in HeLa cells stably expressing the SG marker GFP-G3BP1, using 4  
103 independent siRNAs for each phosphotransferase. After 72 hours, cells were monitored  
104 for the presence of SGs. As expected, GFP-G3BP1 was evenly distributed in the  
105 cytoplasm in control knock down (kd) cells (Fig. 1A). SG formation was detected in a small  
106 fraction of the kd cultures, and typically occurred only in a subpopulation of cells  
107 (examples in Fig. 1A). For every phosphotransferase we calculated a SG score, which  
108 reflects both the strength of the phenotype and its reproducibility, and found that kd of 54  
109 kinases (8%) and 15 phosphatases (6%) led to SG formation with a SG score >10 (with at  
110 least 2 different siRNAs) or >40 (with 1 siRNA). In comparison, control cells transfected  
111 with non-targeting siRNAs had an average SG score of 1.9 (Fig. 1B and 1C, Table S1).

112 To our surprise, phosphotransferases associated with cell cycle regulation, proliferation or  
113 DNA damage were highly represented among the candidates (35%, Fig. 1C). Those  
114 associated with immunity and inflammation (12%) or carbohydrate metabolism (10%)  
115 were also abundant, whereas only few candidates were associated with ribosome and  
116 ribonucleotide biogenesis (3%). Given its central role for mitotic entry and its general  
117 importance in the cell cycle (Itzhaki et al., 1997; Santamaria et al., 2007), we decided to  
118 pursue CDK1 as a candidate that may connect proliferation rates with global protein  
119 synthesis.

### 120 **Inhibition of CDK1 reduces protein synthesis**

121 Since SG-based screens not only report on regulators of translation, but also on  
122 downstream factors that control the assembly and disassembly of SGs, it was important to  
123 test if CDK1 influences global translation rates. To this end, we treated HeLa cells for 1 to  
124 24 hours with the selective, ATP-competitive CDK1 inhibitor Ro3306 (Vassilev et al.,  
125 2006). CDK1 inhibition (CDKi) led to the assembly of SGs (Fig. 2A), and by polysome  
126 profile analysis we observed a progressive decrease in the percentage of polysomal  
127 ribosomes (Fig. 2B), a measure that reflects the proportion of ribosomes engaged in  
128 translation. We also quantified polypeptide synthesis using a puromycin incorporation  
129 assay, and found a similar time-dependent decrease in response to Ro3306 treatment  
130 (Fig. 2C and 2D). These results could be confirmed using a less selective CDK inhibitor,  
131 Roscovitine (Cicenas et al., 2015) (Fig. S1A).

132 We then sought genetic evidence for a role of CDK1 in controlling protein  
133 synthesis. Since CDK1 is an essential gene, we made use of HT2-19, a human HT1080-  
134 derived cell line that contains one inactivated CDK1 allele, whereas the other allele is  
135 under control of a lac repressor and hence transcribed only in the presence of IPTG  
136 (Itzhaki et al., 1997). CDK1 levels were reduced at least 2-fold in HT2-19 cells cultured in  
137 presence of IPTG, and polysomal ribosomes decreased from 43% in parental HT1080 to  
138 32% (Fig. 2E and 2F). CDK1 became barely detectable when HT2-19 cells were kept in  
139 the absence of IPTG for 7 days, and polysomal ribosomes dropped further to 18% (Fig.  
140 2E and 2F). These cells did not divide anymore but increased in cell size (Fig. S1B).

### 141 **CDK1 controls global translation in a cell cycle-independent manner**

142 CDK1 activity changes throughout the cell cycle: it starts to increase during S-phase,  
143 reaches its maximum in metaphase, and declines rapidly in anaphase (Bashir and  
144 Pagano, 2005). In line with its activity profile, CDK1 was shown to control translation  
145 during mitosis both at the level of translation initiation via phosphorylation of raptor  
146 (Ramirez-Valle et al., 2010), 4E-BP1 (Heesom et al., 2001; Shuda et al., 2015; Velasquez  
147 et al., 2016), S6K1 (Papst et al., 1998; Shah et al., 2003) and eIF4GI (Dobrikov et al.,  
148 2014), as well as at the level of elongation via phosphorylation of eEF1B (Monnier et al.,  
149 2001; Sivan et al., 2011) and eEF2K (Smith and Proud, 2008).

150 We noted that CDK1i led to SG formation only in about 10% of cells, which might  
151 be related to the peak of CDK1 activity in mitosis. In order to test if SG formation upon  
152 CDKi is restricted to a specific phase of the cell cycle, we made use of the FUCCI system  
153 and applied Ro3306 to HeLa cells stably expressing either Kusabira-Orange-Cdt1 or  
154 mVenus-Geminin (Sakaue-Sawano et al., 2008). While Cdt1 is expressed during G1- and  
155 early S-phase, Geminin is expressed in S-phase, G2-phase and mitosis. Quantification of  
156 SG-positive cells revealed no preference for a particular cell cycle phase since 10% of the  
157 Kusabira-Orange-Cdt1-positive and 9% of the mVenus-Geminin-positive cells contained  
158 SGs upon CDKi (Fig. 3A and 3B). This result suggested that CDK1 enhances global  
159 protein synthesis in a cell cycle phase-independent manner.

160 To further explore this possibility, we arrested HeLa cells in early S-phase using a  
161 double thymidine (TT) block and, without release from the block, subjected them to CDKi.  
162 Compared to asynchronously proliferating cells (with 70% polysomal ribosomes, Fig. 2B),  
163 the cell cycle arrest alone led to a reduction of global protein synthesis (41% polysomal  
164 ribosomes), and treatment with Ro3306 for 4 hours caused a further decrease to 30%  
165 polysomal ribosomes (Fig. 3C).

166 Likewise, we tested non-proliferating RPE1 cells after 48 hours of serum  
167 starvation. The cells had entered G0-phase, visible through the appearance of primary  
168 cilia (Fig. S2), and still responded to CDK1i by a strong reduction of their translation rate  
169 (Fig. 3D). From these experiments we concluded that enhancing protein synthesis is an  
170 extra-mitotic function of CDK1, which likely serves as a means to adjust protein synthesis  
171 to the overall proliferation rate rather than to a specific phase of the cell cycle.

## 172 **eIF2 $\alpha$ phosphorylation and S6K1 contribute to translation control by CDK1**

173 We then sought to explore the signaling pathway by which CDK1 controls protein  
174 synthesis. Various types of stress cause suppression of translation initiation via  
175 phosphorylation of eIF2 $\alpha$  at serine (S)51, which prevents recharging of the initiator eIF2-  
176 GTP-tRNA<sup>Met</sup> ternary complex (Jackson et al., 2010). Western blot analysis of cytoplasmic  
177 lysates from HeLa cells indicated that CDK1i leads to robust phosphorylation of eIF2 $\alpha$   
178 after 16 hours of Ro3306 treatment (Fig. 4A and 4B), whereas the onset of translation  
179 suppression was visible already 1 hour after CDK1i (Fig. 2B–D). In line with this notion,  
180 translation suppression upon Ro3306 treatment was partially impaired in mouse  
181 embryonic fibroblasts (MEFs) containing a bi-allelic phospho-deficient eIF2 $\alpha$ -S51A (AA)  
182 mutation (Scheuner et al., 2001) as compared to MEFs expressing wild-type eIF2 $\alpha$ -S51  
183 (SS) alleles (Fig. 4C, S3A and S3B). Thus, we concluded that eIF2 $\alpha$  phosphorylation is  
184 alone not responsible for, but contributes to translation inhibition after CDK1i.

185 Next, we examined targets of the mTOR pathway. 4E-BP1, a direct target of  
186 mTORC1, showed an increase in phosphorylation upon CDKi, and accumulated in a  
187 hypophosphorylated form at 16 and 24 hours of Ro3306 treatment (Fig. 4A and 4B).  
188 Since 4E-BP1 phosphorylation controls the integrity of the cap-binding complex  
189 (Sonenberg and Hinnebusch, 2009), we carried out cap pulldown experiments using 7-  
190 methyl-GTP agarose beads. As expected, inhibition of mTORC1 using Torin1 (Thoreen et  
191 al., 2009) led to dissociation of eIF4G, eIF4A1 and eIF3B from eIF4E (Fig. S3C and S3D).  
192 Inhibition of CDK1 by treatment with Ro3306 for 4 or 16 hours, however, did not interfere  
193 with integrity of the cap-binding complex (Fig. S3C and S3D), indicating that CDKi does  
194 not repress translation via inhibition of mTOR signaling.

195 RPS6, a direct target of S6 kinase 1 (S6K1) and indirect target of mTORC1, was  
196 found to be strongly dephosphorylated early upon CDK1i (Fig. 4A and 4B). We first  
197 examined whether S6K1 mediates CDK1-dependent control of translation by generating  
198 HeLa cells that stably overexpress wild type (WT) or constitutively active (CA) S6K1.  
199 Phosphorylation levels of RPS6 were partially restored in the S6K1 overexpressing cells  
200 treated for 4 hours with Ro3306 (Fig. S4A), and translation suppression upon CDK1i was

201 slightly, though significantly, reduced in comparison to control HeLa cells (Fig. 4D and  
202 S4B). We then tested whether RPS6 phosphorylation is responsible for this effect. In  
203 MEFs expressing bi-allelic phospho-deficient RPS6<sup>P<sup>-/-</sup></sup> (Ruvinsky et al., 2005), Ro3306  
204 treatment suppressed translation to the same degree as in control RPS6<sup>P<sup>+/+</sup></sup> MEFs (Fig.  
205 4E and S4C). Taken together, these results indicated that eIF2 $\alpha$  phosphorylation and  
206 S6K1 activity contribute to translation control by CDK1, whereas RPS6 phosphorylation is  
207 not involved.

### 208 **CDK1 affects phosphorylation of translation-associated factors**

209 CDK1 was recently detected in a ribosome interaction capture mass spectrometry  
210 analysis (Simsek et al., 2017), and found to phosphorylate ribosomal protein RPL12  
211 (Imami et al., 2018). Together with our observation that CDK1i affects RPS6  
212 phosphorylation (Fig. 4A and 4B), these findings prompted us to explore whether CDK1  
213 might influence more generally the phosphorylation of ribosomal proteins and/or  
214 ribosome-associated factors. First, we explored if CDK1 indeed interacts with ribosomes.  
215 Polysome profile analysis revealed that a small proportion of CDK1 co-migrates with  
216 polysomes, and shifts to lighter fractions upon disassembly of polysomes by RNaseI (Fig.  
217 5A and S5A).

218 We then sought to identify possible targets of CDK1 associated with ribosomes  
219 using SILAC-based phosphoproteomics. Ribosomal fractions were obtained through  
220 sucrose gradient centrifugation from HeLa cells treated with either DMSO or Ro3306 for 4  
221 hours, and subjected to mass spectrometry analysis. Phosphopeptide enrichment using  
222 PhosSelect iron affinity gel IMAC beads led to the identification of 2918 phosphorylated  
223 residues (Table S3). Ro3306-sensitive sites were detected in several ribosomal proteins  
224 (RPS6, RPS10, RPS17, RPL12, RPL29), translation factors (eIF2B4, eIF3 subunits,  
225 eIF4A1, eIF4B, eIF4GI, eIF5B), translation regulators (LARP1, YTHDF1) as well as  
226 mRNA splicing and export factors (SRRM2, SFSWAP, THOC2, ZC3H11A and eIF4A3). A  
227 prominent reduction of phosphorylation upon CDKi was observed for RPS6 and LARP1  
228 (Fig. 5B), and this result could be verified in a second LC-MS/MS analysis using a smaller  
229 scale, TiO<sub>2</sub>-based enrichment of phosphopeptides (Fig. S5B and Table S4).

### 230 **CDK1 strongly enhances 5'TOP mRNA translation via LARP1**

231 To gain further insight into the translation regulatory function of CDK1, we next performed  
232 ribosome footprint (Ribo-Seq) analysis. Cell cycle phase-dependent effects were avoided  
233 by using RPE1 cells arrested in G<sub>0</sub> through serum starvation, and ribosome density (RD)  
234 was measured at an early time point (4 hours) after CDK1i. As an internal standard, equal



235 amounts of a yeast lysate were spiked into the RPE1 cell lysates prior to RNaseI  
236 digestion, which allowed us to assess both the global and transcript-specific effects of  
237 Ro3306 on translation. To reduce distortion of results through ligation biases, the input  
238 RNA was fragmented by alkaline hydrolysis and subjected to the same library preparation  
239 protocol as the ribosomal footprints. Quality assessment showed the desired read lengths  
240 (Fig. S6A), pronounced periodicity and ORF enrichment for the footprints, but not the input  
241 RNA (Fig. S6B), as well as adequate reproducibility between biological replicates (Fig.  
242 S6A–C). As expected, CDK1i led to a global drop in RD (Fig. 6A, most transcripts below  
243 the diagonal), which corresponds to a two-fold reduction in the average RD (Fig. 6B). This  
244 result is in good agreement with the 3-fold reduction in polysomal ribosomes measured by  
245 polysome profiling (Fig. 3D).

246 The analysis of individual transcripts revealed that CDK1i causes pronounced  
247 suppression of 5'TOP mRNAs, which includes all mRNAs encoding cytosolic ribosomal  
248 proteins (Fig. 6A and 6C). In contrast, mRNAs encoding mitochondrial ribosomal proteins,  
249 which do not contain a 5'TOP motif, or IRES-containing mRNAs, were not particularly  
250 sensitive to CDK1i (Fig. 6A and 6C). We confirmed in HeLa cells that Ro3306 treatment  
251 preferentially reduces the association of 5'TOP mRNAs (RPLP0 and PABPC4) with  
252 polysomes, whereas control mRNAs (EIF2 $\alpha$  and NCL) were barely affected (Fig. 6D,  
253 repeats shown in Fig. S7A and S7B).

254 5'TOP mRNA translation was shown to be controlled by La related protein 1  
255 (LARP1), which directly competes with eIF4E for binding to the cap of these transcripts  
256 (Lahr et al., 2017). Although LARP1 was initially reported to enhance translation of 5'TOP  
257 mRNAs under normal growth conditions (Tcherkezian et al., 2014), more recent evidence  
258 suggests that LARP1 actively represses 5'TOP mRNA translation (Fonseca et al., 2015;  
259 Philippe et al., 2018). This switch in activity appears to be controlled by phosphorylation of  
260 LARP1 (Hong et al., 2017). Since our phosphoproteomics analysis had indicated  
261 prominent changes in LARP1 phosphorylation (Fig. 5B), we decided to test whether the  
262 inhibitory effect of CDK1i on 5'TOP mRNA translation was dependent on LARP1 using  
263 knockout cells ([doi.org/10.1101/491274](https://doi.org/10.1101/491274)). Whereas CDK1i led to a strong reduction of  
264 5'TOP mRNA association with polysomes in WT HEK293T cells, the effect was much  
265 smaller in HEK293T LARP1<sup>-/-</sup> cells (Fig. 6E, repeats shown in Fig. S7C and S7D). Since  
266 both HEK293T WT and LARP1<sup>-/-</sup> cells responded to CDK1i by a reduction of polysomes  
267 (Fig. S7E–G), we concluded that LARP1 is not linked to the effect on global protein  
268 synthesis, while it does mediate the specific effect of CDK1 on enhancing 5'TOP mRNA  
269 translation.

270

## 271 **DISCUSSION**

272

273 Early experiments measuring the incorporation of radiolabelled nucleosides and amino  
274 acids had already pointed to a tight connection between the proliferation rate and the rate  
275 of protein synthesis in cultured fibroblast subjected to contact inhibition (Levine et al.,  
276 1965) or serum deprivation (Rudland, 1974). Current concepts on mechanisms that  
277 couple the two rates focus on the mTOR signaling network, which integrates cues from  
278 growth factors and nutritional sensing in order to control a cell growth checkpoint in late  
279 G1 (Foster et al., 2010). The connection is based upon the notion that active mTOR,  
280 amongst its many effector functions, promotes cell proliferation as well as protein  
281 synthesis and ribosome biogenesis (Laplante and Sabatini, 2012).

282 Our SG-based screen for potential activators of translation revealed several  
283 candidate kinases that are primarily associated with cell cycle, proliferation and DNA  
284 damage (Fig. 1). A similar observation was made in an earlier screen by the Pelkmans  
285 lab, where inhibitors of several cell cycle kinases were found to prevent the dissolution of  
286 SGs (Wippich et al., 2013). These findings prompted us to test whether cell cycle kinases  
287 may be directly involved in controlling protein synthesis, and we decided to focus on  
288 CDK1 given its central role in driving the cell cycle (Santamaria et al., 2007).

289 Our analysis uncovered a novel, cell cycle-independent function of CDK1 in  
290 enhancing overall protein synthesis. We found that global protein synthesis rates are  
291 strongly reduced upon pharmacological inhibition of CDK1 using Ro3306 (Fig. 2) or  
292 Roscovitine (Fig. S1), and specificity of this observation could be confirmed by genetic  
293 inactivation of CDK1 in HT1080-derived HT2-19 cells (Fig. 2E). The effect was general as  
294 Ro3306 suppressed translation in transformed HeLa cells (Fig. 2) as well as in non-  
295 transformed RPE1 cells (Fig. 3D), HEK293T cells (Fig. S7E) and MEFs (Fig. S3A and  
296 S4C).

297 Previous studies identified several translation-associated factors as direct  
298 substrates of CDK1 in mitosis, including S6K1 (Papst et al., 1998; Shah et al., 2003),  
299 Raptor (Ramirez-Valle et al., 2010), eEF2K (Smith and Proud, 2008), eIF4GI (Dobrikov et  
300 al., 2014), 4E-BP1 (Heesom et al., 2001; Shuda et al., 2015; Velasquez et al., 2016),  
301 eEF1D (Monnier et al., 2001; Sivan et al., 2011) and the ribosomal protein RPL12 (Imami  
302 et al., 2018). These studies suggested that CDK1 regulates translation only during  
303 mitosis, and many of the reported CDK1-dependent phosphorylation events (S6K1,  
304 eIF4GI, eEF1D) were proposed to repress global translation in order to increase the  
305 translation of mitosis-specific transcripts. On the other hand, CDK1-dependent  
306 phosphorylation of 4E-BP1 (Heesom et al., 2001; Shuda et al., 2015) and eEF2K (Smith  
307 and Proud, 2008) were linked to a positive role of CDK1 in global translation during

308 mitosis. Our findings suggest that CDK1 also exerts a translation regulatory function  
309 independently of the cell cycle phase, since Ro3306 treatment suppressed translation in  
310 cells arrested in early S-phase (Fig. 3C) or in G0 (Fig. 3D). Thus, we propose that in  
311 addition to controlling translation during mitosis, CDK1 serves as a relay to balance the  
312 overall proliferation rate of a cell with the overall protein synthesis rate. This may be linked  
313 to the notion that CDK1 phosphorylates different substrates depending on its activity  
314 during the cell cycle, its subcellular localization, its association with co-activators (cyclins  
315 or RINGO proteins) and possibly its phosphorylation status (Gupta et al., 2007;  
316 Hochegger et al., 2008; Nebreda, 2006; Swaffer et al., 2016)

317         When addressing the mechanism by which CDK1 enhances global protein  
318 synthesis, we found that CDK1 influences translation initiation via multiple, possibly  
319 redundant pathways. First, we found an increase in eIF2 $\alpha$  phosphorylation upon CDKi  
320 (Fig. 4A), and since translation suppression was reduced in MEFs expressing non-  
321 phosphorylatable eIF2 $\alpha$  S51A (AA) (Fig. 4C), one role of CDK1 is to promote recharging  
322 of the eIF2-GTP-tRNA<sub>i</sub><sup>Met</sup> ternary complex. Second, we observed a pronounced reduction  
323 in RPS6 phosphorylation upon CDKi (Fig. 4A and 5B), and reduced translation  
324 suppression in HeLa cells overexpressing S6K1 (Fig. 4D) indicated that CDK1 also  
325 enhances translation initiation through the S6K1 signaling axis. Of note, CDK1 most likely  
326 does not act via mTOR since CDK1i, in contrast to mTOR inhibition, did not alter the  
327 integrity of the cap binding complex (Fig. S3C and S3D). Third, we could show that CDK1  
328 co-sediments with polysomes (Fig. 5A), and a recent mass spectrometry approach found  
329 CDK1 to be associated with ribosomes (Simsek et al., 2017). This is in line with the notion  
330 that RPL12 is a known substrate of CDK1, and RPL12 phosphorylation was recently  
331 shown to enhance a mitotic translation program (Imami et al., 2018). Hence, it is possible  
332 that CDK1 stimulates global translation by phosphorylating additional proteins of, or  
333 associated with, the ribosome. Finally, our results show that CDK1 is a pronounced  
334 activator of 5'TOP mRNA translation, which includes the synthesis of all ribosomal  
335 proteins (Fig. 6). Hence, CDK1 has a sustained effect on global protein synthesis in  
336 proliferating cells as it enhances translation at the initiation level, possibly also at the  
337 elongation level (Smith and Proud, 2008), and by promoting biogenesis of the protein  
338 synthesis machinery.

339         We were intrigued by the pronounced effect of CDK1i on 5'TOP mRNA translation.  
340 In agreement with this finding, it is well known that cell cycle progression tightly correlates  
341 with 5'TOP mRNA translation. For example, cell cycle arrest in G0, at the beginning of S-  
342 phase or in M-phase, strongly reduces translation of 5'TOP mRNAs (Meyuhas and Kahan,  
343 2015). Likewise, translation of 5'TOP mRNAs is low in resting adult liver cells, but high in  
344 developing fetal liver cells as well as in proliferating adult liver cells during regeneration

345 (Aloni et al., 1992). We propose that CDK1 has a central role in coupling 5'TOP mRNA  
346 translation with the proliferation status of the cell since i) LARP1 phosphorylation is  
347 strongly dependent on CDK1 activity (Fig. 5B) and ii) CDK1 controls 5'TOP mRNA  
348 translation in a LARP1-dependent manner (Fig. 6E). Future studies will need to show if  
349 LARP1 is a direct target of CDK1, and address the detailed mechanism by which CDK1  
350 antagonizes the inhibitory activity of LARP1 on 5'TOP mRNA translation.

351       Taken together, our results suggest that CDK1 acts as a central relay connecting  
352 proliferative cues with protein synthesis. This activity occurs in parallel to the mTOR  
353 kinase, which functions as a signaling hub that couples cues from growth factors and  
354 nutrient sensing with protein synthesis. CDK1 and mTOR thereby share common targets  
355 including S6K1, 4EBP1 and LARP1. Together with mTOR and Ras/Erk, CDK1 appears to  
356 form a homeostatic network that coordinates proliferative cues and growth signals with the  
357 availability of the protein synthesis machinery and the rate of protein synthesis.

358

359 **Acknowledgments**

360 We would like to thank Andy Porter (Imperial College Faculty of Medicine, London, UK) for  
361 generously providing the HT1080 and HT2-19 cell lines, Randal Kaufman (Sanford  
362 Burnham Prebys Medical Discovery Institute, La Jolla, CA, USA) for the eIF2 $\alpha$ -AA and -  
363 SS MEFs, and Oded Meyuhas (Hebrew University of Jerusalem, Israel) for the RPS6<sup>P+/+</sup>  
364 and RPS6<sup>P-/-</sup> MEFs. We also thank John Blenis (Weill Cornell Medicine, New York, NY,  
365 USA) for the S6K1 plasmids, Jamal Tazi (Institut de Génétique Moléculaire de Montpellier,  
366 France) for the G3BP1 cDNA, Atsushi Miyawaki (RIKEN Center for Brain Science, Japan)  
367 for the FUCCI plasmids, and Thomas Mayo (Brigham and Women's Hospital, Harvard  
368 Medical School, Boston, MA, USA) for help with cloning GFP-G3BP1. We are thankful to  
369 Ulrike Friedrich, Guenter Kramer and Bernd Bukau (all at the Center for Molecular Biology  
370 of Heidelberg University, Germany) for providing yeast lysates and assistance with the  
371 Ribo-Seq protocol.

372 Mass spectrometry analysis was carried out by the Core Facility for Mass  
373 Spectrometry & Proteomics at the ZMBH. FACS sorting was done by the FACS core  
374 facility at the ZMBH. siRNA library preparation was performed by the Cellnetworks  
375 Advanced Biological Screening Facility of Heidelberg University, and next generation  
376 sequencing was carried out by the Cellnetworks Deep Sequencing Core Facility of  
377 Heidelberg University.

378 This work was supported by grant SFB 1036 from the Deutsche  
379 Forschungsgemeinschaft (DFG) to G. Stoecklin and M. Knop; grant TRR 186 from the  
380 DFG to A. Ruggieri and G. Stoecklin; grant INST 35/1067-1 FUGG to M. Knop; and grant  
381 6108-00197B from The Danish Council for Independent Research - Natural Sciences to  
382 C.K. Damgaard.

383

384 **Author contributions**

385 K. Haneke performed the screen and carried out most experiments, J. Schott did the  
386 Ribo-Seq bioinformatics analysis, D. Lindner prepared the Ribo-Seq libraries, C. Mongis  
387 and M. Knop were instrumental for the imaging screen, A. Ruggieri generated HeLa-  
388 FUCCI cells, A.K. Hollensen and C.K. Damgaard generated the LARP1<sup>-/-</sup> HEK293T cells,  
389 K. Haneke and G. Stoecklin designed the study, analyzed the data and wrote the  
390 manuscript; and all authors approved the manuscript.

391

392 **Conflict of interest**

393 The authors declare that they have no conflict of interest.

394

## 395 **MATERIALS and METHODS**

### 396 **Plasmid generation**

397 The GFP-G3BP1 sequence was obtained from J. Tazi (Institut de Génétique Moléculaire  
398 de Montpellier, France) and cloned into the NheI and EcoRI sites of pCI-puro, resulting in  
399 pCI-puro-GFP-G3BP1 (p2163). pKH3-HA-S6K1-WT (p2760) and pKH3-HA-S6K1-CA  
400 (F5A-T389E-R5A) (p2762) were kindly provided by J. Blenis (Weill Cornell Medicine, New  
401 York, NY, USA). HA-S6K1-WT and HA-S6K1-CA sequences were amplified using oligos  
402 G4542 and G4543 from plasmid p2760 and p2762, respectively, and cloned into the SmaI  
403 sites of pWPI-BLR (Ruggieri et al., 2012), resulting in the generation of pWPI-BLR-HA-  
404 S6K1-WT (p3669) and pWPI-BLR-HA-S6K1-CA (F5A-T389E-R5A) (p3671). pWPI-  
405 FUCCI-Kusabira-Orange-Cdt1-Zeo and pWPI-FUCCI-mVenus-Geminin-Zeo were  
406 generated by EcoRI-XbaI excision of the human Cdt1 gene N-terminally fused to mKO2  
407 from plasmids pCSII-EF-MCS-mKO2-hCdt1-(30/120) and of the human Geminin gene N-  
408 terminally fused to mVenus from pCSII-EF-MCS-mVenus-hGeminin-(1/110), respectively  
409 (both kindly provided by A. Miyawaki, RIKEN Center for Brain Science, Japan) (Sakaue-  
410 Sawano et al., 2008). Both sequences were inserted into the lentiviral transduction vector  
411 pWPI carrying a zeocin resistance gene.

### 412 **Generation of stable cell lines and knockout cell lines**

413 HeLa GFP-G3BP1 cells were generated by plasmid transfection of pCI-puro-GFP-G3BP1  
414 (p2163) using PEI. 24 h after transfection, cells were subjected to selection pressure by  
415 the addition of 2 µg/ml puromycin (Gibco). After two weeks of selection, mass cell cultures  
416 were FACS-sorted using a BD FACSAria IIIu cell sorter. HeLa-FUCCI-Kusabira-Orange-  
417 hCdt1 and HeLa-FUCCI-mVenus-hGeminin cells were generated by lentiviral transduction  
418 of pWPI-FUCCI-Kusabira-Orange-Cdt1-Zeo and pWPI-FUCCI-mVenus-Geminin-Zeo,  
419 respectively. Retroviral transduction and generation of stable cell lines was performed as  
420 described in (Ruggieri et al., 2012). In short, 293T cells were seeded into 6 cm-diameter  
421 dishes and transfected using the CalPhos mammalian transfection kit (Becton Dickinson)  
422 as recommended by the manufacturer. For transfection, the packaging plasmid  
423 (pCMVΔ8.91), the transfer vector (pWPI-based) and the VSV envelope glycoprotein  
424 expression vector (pMD2.G) were used in a concentration ratio of 3:3:1. Transduction of  
425 HeLa cells with the lentiviral particles was repeated three times every 12 h to achieve high  
426 number of integrates and thus high expression levels. Transduced cell pools were  
427 subjected to selection with medium containing 100 µg/ml zeocin (Invitrogen) and high  
428 expressing cells were sorted by FACS. HeLa-HA-S6K1-WT and HeLa-HA-S6K1-CA cells

429 were generated similarly by retroviral transduction using pWPI-BLR-HA-S6K1-WT (p3669)  
430 and pWPI-BLR-HA-S6K1-CA (F5A-T389E-R5A) (p3671). Cells were subjected to  
431 selection pressure by the addition of 5 µg/ml blasticidin (Invitrogen). To create plasmids  
432 for expression of LARP1-specific gRNAs, LARP1-oligo1 and LARP1-oligo2 were annealed  
433 and cloned into Esp3I-digested LentiCRISPRv2, resulting in a vector designated  
434 LentiCRISPR-LARP1gRNA. HEK293T cells were maintained in DMEM medium (Gibco)  
435 supplemented with 10% fetal calf serum (Gibco) and 100 units/mL penicillin/streptomycin  
436 (Gibco). All cells were cultured at 37°C in 5% (v/v) CO<sub>2</sub>. One day prior to transfection,  
437 HEK293T cells were seeded at a density of 3 x 10<sup>5</sup> cells/well in 6-well plates.  
438 Transfections were carried out using 1 µg LentiCRISPR-LARP1 gRNA and Lipofectamine  
439 2000 Transfection Reagent (Invitrogen) according to manufacturer's protocol. Two days  
440 after transfection, the cells were reseeded at a density of 0.2 cells/well in 96-well plates.  
441 After expansion of single cells, genomic DNA was purified using the GenElute Mammalian  
442 Genomic DNA Miniprep Kits (Millipore) according to manufacturer's protocol. LARP1  
443 CRISPR/Cas9 KO was verified by PCR on genomic DNA using the primers LARP1-oligo3  
444 and LARP1-oligo4, followed by Sanger sequencing of the resulting PCR-product using the  
445 primer LARP1-oligo3.

#### 446 **Cell culture**

447 HeLa cells, HEK293T cells and MEFs were maintained in Dulbeccos's modified Eagle's  
448 medium (DMEM, Gibco) containing 10% fetal calf serum (FCS, PAA Laboratories), 2 mM  
449 L-glutamine, 100 U/ml penicillin and 100 µg/ml streptomycin (all PAN Biotech). eIF2α  
450 Ser51 SS (WT) and AA MEFs (Scheuner et al., 2001) were a kind gift from R. Kaufmann  
451 (Sanford Burnham Prebys Medical Discovery Institute, La Jolla, CA, USA); RPS6<sup>P+/+</sup> and  
452 RPS6<sup>P-/-</sup> MEFs were generously provided by O. Meyuhas (Hebrew University of  
453 Jerusalem, Israel). The generation of HEK293T LARP1<sup>-/-</sup> cells will be published elsewhere  
454 (doi.org/10.1101/491274). HT1080 and HT2-19 cells (Itzhaki et al., 1997) were a kind gift  
455 from A. Porter (Imperial College School of Medicine, London, UK) and were maintained in  
456 Dulbeccos's modified Eagle's (DMEM, Gibco) high glucose and non-essential amino acids  
457 (NEAA) medium containing 10% fetal calf serum (FCS, PAA Laboratories), 2 mM L-  
458 glutamine, 10 mM pyruvate, 40 U/ml penicillin and 40 µg/ml streptomycin (all PAN  
459 Biotech). HT2-19 cells were additionally supplemented with 0.2 mM IPTG (AppliChem).  
460 For CDK1 depletion HT2-19 cells were seeded at very low density and cultured in the  
461 absence of IPTG for 7 days. RPE1 cells, kindly provided by I. Hoffmann (German Cancer  
462 Research Center, Heidelberg), were cultured in HAM's F-12 medium (HAM's F-12 (1:1),  
463 Millipore) containing 10% FCS, 2 mM L-glutamine, 100 U/ml penicillin and 100 µg/ml

464 streptomycin. HeLa-FUCCI-Kusabira-Orange-hCdt1, HeLa-FUCCI-mVenus-hGeminin and  
465 HeLa-GFP-G3BP1 cells were FACS sorted, cultured without selection pressure and  
466 maintained at low passage numbers. All cells were cultured at sub-confluency, at 37°C in  
467 5% CO<sub>2</sub>. For treatment with inhibitors, cells were seeded the evening before, and Ro-  
468 3306 (Sigma, 10 µM), Roscovitine (Sigma, 20 µM), Torin-1 (200 nM, Tocris Bioscience) or  
469 control solvent (DMSO) were diluted in fresh medium, which was added onto the cells for  
470 the indicated times. For synchronization, HeLa cells were subjected to a double thymidine  
471 block following standard procedures (18 h 2 mM thymidine, 9 h release, and 18 h 2 mM  
472 thymidine).

### 473 **Screening approach and SG score**

474 For the siRNA screen, 96-well MGB096-1-2-LGL matriplates (Brooks) were coated with a  
475 siRNA transfection mix containing the Dharmacon siGenome siRNA libraries GU-003505  
476 Human Protein kinase and GU-003705 Human Phosphatase from Thermo Scientific,  
477 Lipofectamine RNAiMAX (Invitrogen), 57 mM sucrose, 0.03% gelatine/fibronectin in  
478 solution and OPTIMEM. The coated plates were prepared for long term storage by drying,  
479 coating and drying were carried out in the Cellnetworks Advanced Biological Screening  
480 Facility of Heidelberg University using the Hamilton “STAR” pipetting robot. The siRNA  
481 libraries were directed against in total 711 human kinases and 256 human phosphatases  
482 including 4 individual siRNAs per gene. 2000 HeLa-GFP-G3BP1 cells per well were  
483 seeded into the 96-well plates, siRNAs were transfected at a final concentration of 50 nM  
484 and kd was carried out for 72 h. Cells were fixed for 10 minutes at RT using 4% PFA in  
485 PBS supplemented with Hoechst dye (1:10000 diluted). Afterwards, cells were washed 3  
486 times and stored in PBS at 4°C and in the dark until examination under the microscope.  
487 Seeding, washing and fixation were done with a microplate suspensor (Thermo Scientific  
488 Multidrop Combi) in order to ensure fast, synchronous and equal handling. SG formation  
489 was analyzed using a Nikon eclipse Ti-E microscope and a Nikon plan Apo 60x oil  
490 objective that was constantly supplied with immersion oil by a pumping system. 16 images  
491 per well were taken automatically using a sCMOS camera (Flash4, Hamamatsu), Nikon  
492 JOBS software and the Nikon perfect focus system, and images were subsequently  
493 analyzed by eye. For every phosphotransferase, a SG score was calculated by multiplying  
494 the sum of SG-containing cells, observed with all 4 siRNAs, by the number of siRNAs  
495 causing SGs.



## 496 **Immunofluorescence (IF) and microscopy**

497 Cells were seeded onto glass coverslips one day before drug treatment. Cells were fixed  
498 with 4% paraformaldehyde (PFA) for 10 min, permeabilized with 0.5% Triton-X in PBS for  
499 10 min and blocked with 3% BSA in PBS for 1 h at RT. Cy3- or Cy2-conjugated secondary  
500 donkey antibodies (Jackson ImmunoResearch Laboratories, West Grove, PA) were used  
501 for detection of primary antibodies. DNA was stained with Hoechst dye (1: 10000, Sigma).  
502 Coverslips were mounted onto glass slides using a solution of 14% polyvinyl-alcohol  
503 (P8136, Sigma) and 30% glycerol in PBS. Microscopy was performed on a Leica DM  
504 5000 Microscope using a 20x or 40x dry objective, or a 40x oil objective. Alternatively, a  
505 Nikon eclipse Ti-E microscope was used in combination with a 40x dry objective or a 60x  
506 oil objective. Images were taken with an Andor CCD camera or a pco edge sCMOS  
507 camera, and subsequently processed and analyzed using Adobe Photoshop and Fiji  
508 software.

## 509 **Western blot analysis**

510 Cells were lysed by scraping in ice-cold protein lysis buffer (50 mM Tris-HCl pH 7.4, 150  
511 mM NaCl, 15 mM MgCl<sub>2</sub>, 1% Triton X-100) supplemented with EDTA-free protease  
512 inhibitor cocktail (Roche) and phosphatase inhibitors (1 mM sodium vanadate, 50 mM  
513 sodium fluoride, 0.04 μM okadaic acid). Samples were incubated for 5 min on ice and  
514 nuclei were removed by centrifugation for 5 min at 10,000 g at 4°C. 10–20 μg total protein  
515 was diluted in SDS sample buffer (4 % SDS, 20 % Glycerol, 10 % DTT, 0.004 %  
516 Bromphenol Blue, 0.125 M Tris HCl), loaded onto 5–20% polyacrylamide gradient gels  
517 and transferred to a 0.2 μm pore size nitrocellulose membrane (PeqLab) by wet blotting.  
518 Membranes were blocked in 5% milk or 5% BSA (both diluted in PBS) at RT, incubated  
519 with primary antibodies diluted in PBSA overnight at 4°C and washed with TBS containing  
520 1% Tween 20 (TBST). Horseradish peroxidase (HRP)-conjugated secondary antibodies  
521 (Jackson Immunoresearch, diluted 1:5000 in PBS) and Western Lightning Enhanced  
522 Chemiluminescence substrate (Perkin Elmer) were used for detection.

## 523 **Antibodies**

524 Mouse anti-G3BP1 (TT-Y) (Santa Cruz sc-81940), mouse anti-acetylated tubulin (Sigma  
525 C3B9), goat anti-eIF3B (Santa Cruz sc-16377), mouse anti-puromycin (Millipore  
526 MABE343), mouse anti-CDK1 (B-6) (Santa Cruz sc-8395), rabbit anti-RPS6 (5G10) (Cell  
527 Signaling #2217), rabbit anti-phospho-eIF2alpha (Cell Signaling #9721), rabbit anti-  
528 eIF2alpha (Cell Signaling #9722), rabbit anti-4E-BP1 (Cell Signaling #9644), rabbit anti-  
529 phospho-4E-BP1 (Thr37/46) (Cell Signaling #236B4), rabbit anti-phospho-RPS6

530 (Ser235/236) (D57.2.2E) (Cell Signaling #4858), mouse anti-tubulin (DM1A) (Sigma  
531 T9026), mouse anti-HA.11 (MMS-101P, Covance), rabbit anti-RPS10 (Abcam ab151550),  
532 mouse anti-RPS3 (Santa Cruz sc-376098), rabbit anti-LARP1 (Abcam ab86359), mouse  
533 anti-FLAG M2 (Sigma F 3165), mouse anti-eIF4E (P-2) (Santa Cruz sc-9976), rabbit anti-  
534 eIF4G (Santa Cruz sc-11373), goat anti-eIF4A1 (Santa Cruz sc-14211)

### 535 **Primers**

536 G1714, 5'-GAAGGCTCATGGCAAGAAGG-3' (beta globin fw)  
537 G1715, 5'-ATGATGAGACAGCACATAACCAG-3' (beta globin rev)  
538 G2943 5'-TGGAGACTCTCAGGGTCGAAA-3' (CDKN1A fw)  
539 G2944 5'-GGCGTTTGGAGTGGTAGAAATC-3' (CDKN1A rev)  
540 G2979, 5'-TCGATGGGCGATCTATTTCCCTGT-3' (NCL fw)  
541 G2980, 5'-TGTTGCACTGTAGGAGAGGTTGCT-3' (NCL rev)  
542 G3007, 5'-GAGTTCGAGTCCGGCATCT-3' (RPS7 fw)  
543 G3008, 5'-CGACCACCACCAACTTCAA-3' (RPS7 rev)  
544 G4542: 5'-GATCCCCCGGGAATAACATCCACTTTGCCTTTCTC-3'  
545 G4543: 5'-TTTCCCGGGTCATAGATTCATACGCAGGTGC-3'  
546 G4737, 5'-TCTACAGAAAACATGCCCATTAAG-3' (EIF2S1 fw)  
547 G4738, 5'-GCCATAGCTTGACTGAGGACA-3' (EIF2S1 rev)  
548 G4739, 5'-TCTACAACCCTGAAGTGCTTGAT-3' (RPLP0 fw)  
549 G4740, 5'-CAATCTGCAGACAGACACTGG-3' (RPLP0 rev)  
550 G4753, 5'-GTAGGCCGTGCACAAAAGA-3' (PABPC4 fw)  
551 G4754, 5'-AATGTAGAGATTCACCCCCTGA-3' (PABPC4 rev)  
552 G4976, 5'-CTGGGTGAAGAATGGAAGGGTT-3' (RPS6 fw)  
553 G4988, 5'-TGCATCCACAATGCAACCAC-3' (RPS6 rev)  
554 LARP1-oligo1, 5'-CACCGAGACACATACCTGCCAATCG-3'  
555 LARP1-oligo2, 5'-AAACCGATTGGCAGGTATGTGTCTC-3'  
556 LARP1-oligo3, 5'-GGGAAAGGGATCTGCCCAAG-3'  
557 LARP1-oligo4, 5'-CACCGAGCCCCATCACTCTTC-3'

### 558 **Polysome profile analysis**

559 Cells were seeded one day before the experiment and kept at sub-confluency in order to  
560 prevent translation suppression by contact inhibition. Cells were then treated with 100  
561 µg/ml cycloheximide (CHX) for 5 min at RT in order to stabilize existing polysomes before  
562 washing with ice-cold PBS and harvesting by scraping in polysome lysis buffer (20 mM  
563 Tris HCl pH 7.5, 150 mM NaCl, 5 mM MgCl<sub>2</sub>, 1 mM DTT, 100 mg/ml CHX, 1% Triton X-

564 100, 40 U/ml RNasin, EDTA-free complete protease inhibitors (Roche)). Lysates were  
565 rotated end over end for 10 min at 4°C and cleared by centrifugation at 10,000 g for 10  
566 min at 4°C. 40 µl lysate were saved for Western blot analysis before the cellular lysate  
567 was loaded onto linear 17.5–50% sucrose gradients (dissolved in 20 mM Tris-HCl pH 7.5,  
568 5 mM MgCl<sub>2</sub>, 150 mM NaCl). Sucrose density gradient centrifugation was carried out at  
569 35,000 rpm at 4°C using a SW60 rotor (Beckman) for 2.5 h. Polysome profiles were  
570 recorded by measuring the absorbance at 254 nm using a Teledyne ISCO Foxy Jr. or a  
571 Teledyne ISCO Foxy R1 system in combination with PeakTrak software. Profiles were  
572 then aligned manually according to the 80S peak, and the percentage of polysomal  
573 ribosomes was calculated by dividing the area under the curve of the polysomal  
574 ribosomes by the total area under the curve.

### 575 **Polysome fractionation**

576 During gradient elution, fractions of approximately 300 µl were collected every 14  
577 seconds. For RNA isolation, 300 µl Urea buffer (10 mM Tris pH 7.5, 350 mM NaCl, 10 mM  
578 EDTA, 1 % SDS and 7 M urea) containing 25 fmol rabbit HBB2 *in vitro* transcript and 300  
579 µl Phenol:Chloroform:Isamylalcohol (PCI) (25:24:1) were added to each fraction. After  
580 phase separation, RNA was isolated from the aqueous phase and precipitated using  
581 isopropanol. RNA levels in the different fractions were subsequently analyzed by qPCR as  
582 follows: RNA was reverse transcribed using the MMLV reverse transcriptase (Promega),  
583 followed by cDNA amplification using the PowerUp SYBR Green Master Mix (Thermo  
584 Fisher Scientific) and the QuantStudio 5 Real-TimePCR system (Thermo Fisher  
585 Scientific). All CT values were normalized to the HBB2 spike-in transcript in order to  
586 correct for isolation differences.

587 For protein purification, 300 µl Tris-HCl (20 mM, pH 7.5) and 10 µl StrataClear  
588 beads were added to each fraction. Samples were rotated end over end at 4°C overnight,  
589 centrifuged at ~ 100 g for 2 min., and proteins were eluted from the beads using SDS  
590 sample buffer.

### 591 **Ribosome footprint (Ribo-Seq) analysis**

592 RPE1 cells were cultured in the absence of FBS for 48 h. Afterwards, cells were incubated  
593 for 4 h in fresh medium without FBS supplemented with either DMSO or Ro3306, washed  
594 once in ice-cold PBS supplemented with 100 µg/ml CHX and harvested by scraping in  
595 polysome lysis buffer. Lysates were rotated end over end for 10 min at 4°C and cleared  
596 by centrifugation at 10,000 g for 10 min at 4°C. The DMSO- and Ro3306-treated samples  
597 were adjusted to the same OD260 before yeast polysome lysate (2% of the RPE1 lysates

598 according to OD260 measurement) was spiked into each sample. 10% of the lysates were  
599 saved as input samples. The lysates were subsequently digested with RNase I (60 units  
600 per OD260) for 5 min at 4°C, and the reaction was stopped by addition of Superase  
601 Inhibitor (6 units). Samples were then fractionated by 17.5–50% sucrose density gradient  
602 centrifugation, and RNA was purified from the cytoplasmic lysate (input) or from the  
603 monosomal fractions (ribosome protected fragments) using PCI (25:24:1) by phase  
604 separation. Both input and ribosome protected fragments were depleted of rRNA with the  
605 Ribo-Zero Gold Kit (Illumina). Input RNA was randomly fragmented by alkaline hydrolysis  
606 at pH 10 for 12 min at 95°C. Fragmented RNA and ribosome protected fragments were  
607 size-selected (25 - 35 nt) on a 15% polyacrylamide TBE-urea gel. After end-repair with T4  
608 PNK, 3 ng per sample were used for library preparation using the NEXTflex Small RNA-  
609 Seq Kit v3 according to the manufacturer's manual. Libraries were multiplexed and  
610 sequenced on one lane of a NextSeq500 sequencer (Illumina).

611 For Ribo-Seq data analysis, adapter sequences were first removed with the  
612 FASTX-toolkit ([http://hannonlab.cshl.edu/fastx\\_toolkit/](http://hannonlab.cshl.edu/fastx_toolkit/)), and the four random nucleotides  
613 at the beginning and end of the reads were trimmed. Read alignment was then performed  
614 using bowtie (Langmead et al., 2009). Reads that did not map to human tRNA or rRNA  
615 sequences were aligned to a common human transcriptome reference  
616 (wgEncodeGencodeBasicV27) and a yeast transcriptome (sacCer3ensGene). In order to  
617 summarize reads at the gene level, only reads that map to the annotated ORF of isoforms  
618 of one specific gene (as defined by a common gene symbol) were counted with an in-  
619 house-developed perl script. In order to identify individually regulated mRNAs with  
620 DESeq2, human read counts were normalized with the median ratio method before  
621 calculating average fold-changes, and p-values for changes in ribosome density were  
622 obtained from a likelihood ratio test (Love et al., 2014). The sum of read counts assigned  
623 to yeast or human ORFs was used in order to measure global changes in translation  
624 efficiency. For categorization, mRNAs that contain an IRES-element (according to  
625 [http://iresite.org/IRESite\\_web.php?page=browse\\_cellular\\_transcripts](http://iresite.org/IRESite_web.php?page=browse_cellular_transcripts)) or a 5'TOP motif  
626 (according to (Meyuhas and Kahan, 2015)) were grouped.

## 627 **Puromycin incorporation**

628 Cell were treated with 10 µg/ml puromycin (Gibco, Life Technologies) for 5 min at 37°C,  
629 washed twice with PBS and lysed in protein lysis buffer. For Western blot analysis, equal  
630 amounts of total cell lysates were separated by SDS-PAGE. Puromycin signals were  
631 detected with anti-puromycin antibody. The signal intensity was measured along the entire  
632 lane and normalized to the overall Ponceau S staining of the corresponding lane.

### 633 **Phosphoproteomics**

634 HeLa cells were cultured in SILAC medium (DMEM without arginine, lysine, glutamine and  
635 pyruvate, containing 10% FBS for SILAC (Silantes), 2 mM L-glutamine, 100 U/ml penicillin  
636 and 100 µg/ml streptomycin (all PAN Biotech) and either light- or heavy-labeled amino  
637 acids (SILAC amino acids (Silantes 211603902 and 201603902)) for 14 days. 4 times  $3.5 \times 10^6$   
638  $\times 10^6$  heavy-labeled cells and 4 times  $3.5 \times 10^6$  light-labeled cells were seeded into in total  
639 8 15-cm dishes. Light-labeled cells were treated with DMSO and heavy-labeled cells with  
640 Ro3306 (10 µM) for 4 h, and labels were swapped in the repeat experiment. Cells were  
641 washed with ice-cold PBS, 200 µl low magnesium polysome lysis buffer (20 mM Tris HCl  
642 pH 7.5, 150 mM NaCl, 0.25 mM MgCl<sub>2</sub>, 1 mM DTT, 100 mg/ml CHX, 1% Triton X-100, 40  
643 U/ml RNasin, EDTA-free complete protease inhibitors (Roche), phosphatase inhibitors  
644 (PhosphoSTOP, Roche)) were added and lysates were harvested by scraping. Lysates  
645 were then rotated end over end for 10 min at 4°C and cleared by centrifugation at 10,000  
646 g for 10 min at 4°C. The total protein content of the lysate was measured using a Bradford  
647 assay. Equal amounts of total protein from the heavy and the light sample were mixed  
648 and loaded onto low magnesium 17.5–50% sucrose gradients (dissolved in 20 mM Tris-  
649 HCl pH 7.5, 5 mM MgCl<sub>2</sub>, 150 mM NaCl). Sucrose density gradient centrifugation was  
650 carried out as described above, and ribosomal fractions were pooled. Proteins were  
651 precipitated using the Wessel-Flügge precipitation protocol (Wessel and Flugge, 1984).  
652 Samples were enriched for phosphopeptides using PhosSelect iron affinity gel IMAC  
653 beads (first repeat) or by TiO<sub>2</sub>-SIMAC-HILIC (TiSH) phosphopeptide enrichment and  
654 fractionation (second repeat), and subsequently subjected to mass spectrometry and  
655 Maxquant analysis at the Core Facility for Mass Spectrometry & Proteomics of the ZMBH.  
656 Go annotations were added using Perseus software.

### 657 **Cap pulldown assay**

658 Cells were lysed by scraping in cap pulldown lysis buffer (50 mM Tris-HCl pH 7.8, 150 mM  
659 NaCl, 1 mM EDTA, EDTA-free complete protease inhibitors (Roche)). Lysates were then  
660 rotated end over end for 10 min at 4°C and nuclei were pelleted by centrifugation at  
661 10,000 g for 10 min at 4°C. 10% of total cell lysates were saved as input samples. 50 µl of  
662  $\gamma$ -aminophenyl-<sup>7</sup>GTP agarose C10-linked beads (Jena Biosciences) were added to the  
663 remaining sample, which was then rotated end over end at 4°C overnight. Beads were  
664 washed 5 times using cap pulldown wash buffer (10 mM Tris-HCl pH 7.8, 150 mM NaCl,  
665 0.1% NP40) and eluted with SDS sample buffer.

666 **Statistical analysis**

667 Statistical analysis was performed using Microsoft Excel 2010 or Graph-Pad Prism  
668 software (GraphPad). Statistical significance was calculated by performing a one-tailed  
669 Student's t test or a one-tailed one-sample t test (\*\*\*,  $p < 0.001$ ; \*\*,  $p < 0.01$ ; \*,  $p < 0.05$ ).

670

671 **REFERENCES**

672

673 Aloni, R., D. Peleg, and O. Meyuhos. 1992. Selective translational control and nonspecific  
674 posttranscriptional regulation of ribosomal protein gene expression during  
675 development and regeneration of rat liver. *Mol Cell Biol.* 12:2203-2212.

676 Aviner, R., T. Geiger, and O. Elroy-Stein. 2013. Novel proteomic approach (PUNCH-P)  
677 reveals cell cycle-specific fluctuations in mRNA translation. *Genes Dev.* 27:1834-  
678 1844.

679 Bashir, T., and M. Pagano. 2005. Cdk1: the dominant sibling of Cdk2. *Nat Cell Biol.* 7:779-  
680 781.

681 Cicenias, J., K. Kalyan, A. Sorokinas, E. Stankunas, J. Levy, I. Meskinyte, V. Stankevicius,  
682 A. Kaupinis, and M. Valius. 2015. Roscovitine in cancer and other diseases. *Ann*  
683 *Transl Med.* 3:135.

684 Dobrikov, M.I., M. Shveygert, M.C. Brown, and M. Gromeier. 2014. Mitotic  
685 phosphorylation of eukaryotic initiation factor 4G1 (eIF4G1) at Ser1232 by  
686 Cdk1:cyclin B inhibits eIF4A helicase complex binding with RNA. *Mol Cell Biol.*  
687 34:439-451.

688 Fonseca, B.D., C. Zakaria, J.J. Jia, T.E. Graber, Y. Svitkin, S. Tahmasebi, D. Healy, H.D.  
689 Hoang, J.M. Jensen, I.T. Diao, A. Lussier, C. Dajadian, N. Padmanabhan, W.  
690 Wang, E. Matta-Camacho, J. Hearnden, E.M. Smith, Y. Tsukumo, A. Yanagiya, M.  
691 Morita, E. Petroulakis, J.L. Gonzalez, G. Hernandez, T. Alain, and C.K. Damgaard.  
692 2015. La-related Protein 1 (LARP1) Represses Terminal Oligopyrimidine (TOP)  
693 mRNA Translation Downstream of mTOR Complex 1 (mTORC1). *J Biol Chem.*  
694 290:15996-16020.

695 Foster, D.A., P. Yellen, L. Xu, and M. Saqcena. 2010. Regulation of G1 Cell Cycle  
696 Progression: Distinguishing the Restriction Point from a Nutrient-Sensing Cell  
697 Growth Checkpoint(s). *Genes Cancer.* 1:1124-1131.

698 Gandin, V., L. Masvidal, L. Hulea, S.P. Gravel, M. Cargnello, S. McLaughlan, Y. Cai, P.  
699 Balanathan, M. Morita, A. Rajakumar, L. Furic, M. Pollak, J.A. Porco, Jr., J. St-  
700 Pierre, J. Pelletier, O. Larsson, and I. Topisirovic. 2016. nanoCAGE reveals 5'  
701 UTR features that define specific modes of translation of functionally related  
702 MTOR-sensitive mRNAs. *Genome Res.* 26:636-648.

703 Gupta, M., D. Trott, and A.C. Porter. 2007. Rescue of a human cell line from endogenous  
704 Cdk1 depletion by Cdk1 lacking inhibitory phosphorylation sites. *J Biol Chem.*  
705 282:4301-4309.

706 Heesom, K.J., A. Gampel, H. Mellor, and R.M. Denton. 2001. Cell cycle-dependent  
707 phosphorylation of the translational repressor eIF-4E binding protein-1 (4E-BP1).  
708 *Curr Biol.* 11:1374-1379.

709 Hochegger, H., S. Takeda, and T. Hunt. 2008. Cyclin-dependent kinases and cell-cycle  
710 transitions: does one fit all? *Nat Rev Mol Cell Biol.* 9:910-916.

711 Hong, S., M.A. Freeberg, T. Han, A. Kamath, Y. Yao, T. Fukuda, T. Suzuki, J.K. Kim, and  
712 K. Inoki. 2017. LARP1 functions as a molecular switch for mTORC1-mediated  
713 translation of an essential class of mRNAs. *Elife.* 6.

714 Imami, K., M. Milek, B. Bogdanow, T. Yasuda, N. Kastelic, H. Zauber, Y. Ishihama, M.  
715 Landthaler, and M. Selbach. 2018. Phosphorylation of the Ribosomal Protein  
716 RPL12/uL11 Affects Translation during Mitosis. *Mol Cell.* 72:84-98 e89.

717 Itzhaki, J.E., C.S. Gilbert, and A.C. Porter. 1997. Construction by gene targeting in human

- 718 cells of a "conditional" CDC2 mutant that rereplicates its DNA. *Nat Genet.* 15:258-  
719 265.
- 720 Jackson, R.J., C.U. Hellen, and T.V. Pestova. 2010. The mechanism of eukaryotic  
721 translation initiation and principles of its regulation. *Nat Rev Mol Cell Biol.* 11:113-  
722 127.
- 723 Kedersha, N., P. Ivanov, and P. Anderson. 2013. Stress granules and cell signaling: more  
724 than just a passing phase? *Trends Biochem Sci.* 38:494-506.
- 725 Kenney, J.W., C.E. Moore, X. Wang, and C.G. Proud. 2014. Eukaryotic elongation factor  
726 2 kinase, an unusual enzyme with multiple roles. *Adv Biol Regul.* 55:15-27.
- 727 Lahr, R.M., B.D. Fonseca, G.E. Ciotti, H.A. Al-Ashtal, J.J. Jia, M.R. Niklaus, S.P. Blagden,  
728 T. Alain, and A.J. Berman. 2017. La-related protein 1 (LARP1) binds the mRNA  
729 cap, blocking eIF4F assembly on TOP mRNAs. *Elife.* 6.
- 730 Langmead, B., C. Trapnell, M. Pop, and S.L. Salzberg. 2009. Ultrafast and memory-  
731 efficient alignment of short DNA sequences to the human genome. *Genome Biol.*  
732 10:R25.
- 733 Laplante, M., and D.M. Sabatini. 2012. mTOR signaling in growth control and disease.  
734 *Cell.* 149:274-293.
- 735 Levine, E.M., Y. Becker, C.W. Boone, and H. Eagle. 1965. Contact Inhibition,  
736 Macromolecular Synthesis, and Polyribosomes in Cultured Human Diploid  
737 Fibroblasts. *Proc Natl Acad Sci U S A.* 53:350-356.
- 738 Love, M.I., W. Huber, and S. Anders. 2014. Moderated estimation of fold change and  
739 dispersion for RNA-seq data with DESeq2. *Genome Biol.* 15:550.
- 740 Malumbres, M., and M. Barbacid. 2005. Mammalian cyclin-dependent kinases. *Trends*  
741 *Biochem Sci.* 30:630-641.
- 742 Meyuhas, O., and T. Kahan. 2015. The race to decipher the top secrets of TOP mRNAs.  
743 *Biochim Biophys Acta.* 1849:801-811.
- 744 Monnier, A., R. Belle, J. Morales, P. Cormier, S. Boulben, and O. Mulner-Lorillon. 2001.  
745 Evidence for regulation of protein synthesis at the elongation step by CDK1/cyclin  
746 B phosphorylation. *Nucleic Acids Res.* 29:1453-1457.
- 747 Nandagopal, N., and P.P. Roux. 2015. Regulation of global and specific mRNA translation  
748 by the mTOR signaling pathway. *Translation (Austin).* 3:e983402.
- 749 Nebreda, A.R. 2006. CDK activation by non-cyclin proteins. *Curr Opin Cell Biol.* 18:192-  
750 198.
- 751 Papst, P.J., H. Sugiyama, M. Nagasawa, J.J. Lucas, J.L. Maller, and N. Terada. 1998.  
752 Cdc2-cyclin B phosphorylates p70 S6 kinase on Ser411 at mitosis. *J Biol Chem.*  
753 273:15077-15084.
- 754 Pardee, A.B. 1989. G1 events and regulation of cell proliferation. *Science.* 246:603-608.
- 755 Philippe, L., J.J. Vasseur, F. Debart, and C.C. Thoreen. 2018. La-related protein 1  
756 (LARP1) repression of TOP mRNA translation is mediated through its cap-binding  
757 domain and controlled by an adjacent regulatory region. *Nucleic Acids Res.*  
758 46:1457-1469.
- 759 Polymenis, M., and R. Aramayo. 2015. Translate to divide: small es, Cyrillicontrol of the  
760 cell cycle by protein synthesis. *Microb Cell.* 2:94-104.
- 761 Ramirez-Valle, F., M.L. Badura, S. Braunstein, M. Narasimhan, and R.J. Schneider. 2010.  
762 Mitotic raptor promotes mTORC1 activity, G(2)/M cell cycle progression, and  
763 internal ribosome entry site-mediated mRNA translation. *Mol Cell Biol.* 30:3151-



- 764 3164.
- 765 Roux, P.P., and I. Topisirovic. 2018. Signaling Pathways Involved in the Regulation of  
766 mRNA Translation. *Mol Cell Biol.* 38.
- 767 Rudland, P.S. 1974. Control of translation in cultured cells: continued synthesis and  
768 accumulation of messenger RNA in nondividing cultures. *Proc Natl Acad Sci U S*  
769 *A.* 71:750-754.
- 770 Ruggero, D., and P.P. Pandolfi. 2003. Does the ribosome translate cancer? *Nature*  
771 *reviews. Cancer.* 3:179-192.
- 772 Ruggieri, A., E. Dazert, P. Metz, S. Hofmann, J.P. Bergeest, J. Mazur, P. Bankhead, M.S.  
773 Hiet, S. Kallis, G. Alvisi, C.E. Samuel, V. Lohmann, L. Kaderali, K. Rohr, M. Frese,  
774 G. Stoecklin, and R. Bartenschlager. 2012. Dynamic oscillation of translation and  
775 stress granule formation mark the cellular response to virus infection. *Cell Host*  
776 *Microbe.* 12:71-85.
- 777 Ruvinsky, I., N. Sharon, T. Lerer, H. Cohen, M. Stolovich-Rain, T. Nir, Y. Dor, P. Zisman,  
778 and O. Meyuhas. 2005. Ribosomal protein S6 phosphorylation is a determinant of  
779 cell size and glucose homeostasis. *Genes Dev.* 19:2199-2211.
- 780 Sakaue-Sawano, A., H. Kurokawa, T. Morimura, A. Hanyu, H. Hama, H. Osawa, S.  
781 Kashiwagi, K. Fukami, T. Miyata, H. Miyoshi, T. Imamura, M. Ogawa, H. Masai,  
782 and A. Miyawaki. 2008. Visualizing spatiotemporal dynamics of multicellular cell-  
783 cycle progression. *Cell.* 132:487-498.
- 784 Santamaria, D., C. Barriere, A. Cerqueira, S. Hunt, C. Tardy, K. Newton, J.F. Caceres, P.  
785 Dubus, M. Malumbres, and M. Barbacid. 2007. Cdk1 is sufficient to drive the  
786 mammalian cell cycle. *Nature.* 448:811-815.
- 787 Scheuner, D., B. Song, E. McEwen, C. Liu, R. Laybutt, P. Gillespie, T. Saunders, S.  
788 Bonner-Weir, and R.J. Kaufman. 2001. Translational control is required for the  
789 unfolded protein response and in vivo glucose homeostasis. *Mol Cell.* 7:1165-  
790 1176.
- 791 Shah, O.J., S. Ghosh, and T. Hunter. 2003. Mitotic regulation of ribosomal S6 kinase 1  
792 involves Ser/Thr, Pro phosphorylation of consensus and non-consensus sites by  
793 Cdc2. *J Biol Chem.* 278:16433-16442.
- 794 Shi, Z., and M. Barna. 2015. Translating the genome in time and space: specialized  
795 ribosomes, RNA regulons, and RNA-binding proteins. *Annu Rev Cell Dev Biol.*  
796 31:31-54.
- 797 Shuda, M., C. Velasquez, E. Cheng, D.G. Cordek, H.J. Kwun, Y. Chang, and P.S. Moore.  
798 2015. CDK1 substitutes for mTOR kinase to activate mitotic cap-dependent protein  
799 translation. *Proc Natl Acad Sci U S A.* 112:5875-5882.
- 800 Silvera, D., S.C. Formenti, and R.J. Schneider. 2010. Translational control in cancer.  
801 *Nature reviews. Cancer.* 10:254-266.
- 802 Simsek, D., G.C. Tiu, R.A. Flynn, G.W. Byeon, K. Leppek, A.F. Xu, H.Y. Chang, and M.  
803 Barna. 2017. The Mammalian Ribo-interactome Reveals Ribosome Functional  
804 Diversity and Heterogeneity. *Cell.* 169:1051-1065 e1018.
- 805 Sivan, G., R. Aviner, and O. Elroy-Stein. 2011. Mitotic modulation of translation elongation  
806 factor 1 leads to hindered tRNA delivery to ribosomes. *J Biol Chem.* 286:27927-  
807 27935.
- 808 Smith, E.M., and C.G. Proud. 2008. cdc2-cyclin B regulates eEF2 kinase activity in a cell  
809 cycle- and amino acid-dependent manner. *EMBO J.* 27:1005-1016.
- 810 Sonenberg, N., and A.G. Hinnebusch. 2009. Regulation of translation initiation in

- 811 eukaryotes: mechanisms and biological targets. *Cell*. 136:731-745.
- 812 Stumpf, C.R., M.V. Moreno, A.B. Olshen, B.S. Taylor, and D. Ruggero. 2013. The  
813 translational landscape of the mammalian cell cycle. *Mol Cell*. 52:574-582.
- 814 Swaffer, M.P., A.W. Jones, H.R. Flynn, A.P. Snijders, and P. Nurse. 2016. CDK Substrate  
815 Phosphorylation and Ordering the Cell Cycle. *Cell*. 167:1750-1761 e1716.
- 816 Tanenbaum, M.E., N. Stern-Ginossar, J.S. Weissman, and R.D. Vale. 2015. Regulation of  
817 mRNA translation during mitosis. *Elife*. 4.
- 818 Tcherkezian, J., M. Cargnello, Y. Romeo, E.L. Huttlin, G. Lavoie, S.P. Gygi, and P.P.  
819 Roux. 2014. Proteomic analysis of cap-dependent translation identifies LARP1 as  
820 a key regulator of 5'TOP mRNA translation. *Genes Dev*. 28:357-371.
- 821 Thoreen, C.C., S.A. Kang, J.W. Chang, Q. Liu, J. Zhang, Y. Gao, L.J. Reichling, T. Sim,  
822 D.M. Sabatini, and N.S. Gray. 2009. An ATP-competitive mammalian target of  
823 rapamycin inhibitor reveals rapamycin-resistant functions of mTORC1. *J Biol*  
824 *Chem*. 284:8023-8032.
- 825 Truitt, M.L., and D. Ruggero. 2016. New frontiers in translational control of the cancer  
826 genome. *Nature reviews. Cancer*. 16:288-304.
- 827 van Riggelen, J., A. Yetil, and D.W. Felsher. 2010. MYC as a regulator of ribosome  
828 biogenesis and protein synthesis. *Nature reviews. Cancer*. 10:301-309.
- 829 Vassilev, L.T., C. Tovar, S. Chen, D. Knezevic, X. Zhao, H. Sun, D.C. Heimbrosk, and L.  
830 Chen. 2006. Selective small-molecule inhibitor reveals critical mitotic functions of  
831 human CDK1. *Proceedings of the National Academy of Sciences of the United*  
832 *States of America*. 103:10660-10665.
- 833 Velasquez, C., E. Cheng, M. Shuda, P.J. Lee-Oesterreich, L. Pogge von Strandmann,  
834 M.A. Gritsenko, J.M. Jacobs, P.S. Moore, and Y. Chang. 2016. Mitotic protein  
835 kinase CDK1 phosphorylation of mRNA translation regulator 4E-BP1 Ser83 may  
836 contribute to cell transformation. *Proc Natl Acad Sci U S A*. 113:8466-8471.
- 837 Wessel, D., and U.I. Flugge. 1984. A method for the quantitative recovery of protein in  
838 dilute solution in the presence of detergents and lipids. *Anal Biochem*. 138:141-  
839 143.
- 840 Wippich, F., B. Bodenmiller, M.G. Trajkovska, S. Wanka, R. Aebersold, and L. Pelkmans.  
841 2013. Dual specificity kinase DYRK3 couples stress granule  
842 condensation/dissolution to mTORC1 signaling. *Cell*. 152:791-805.
- 843

Figure 1, Haneke et al.

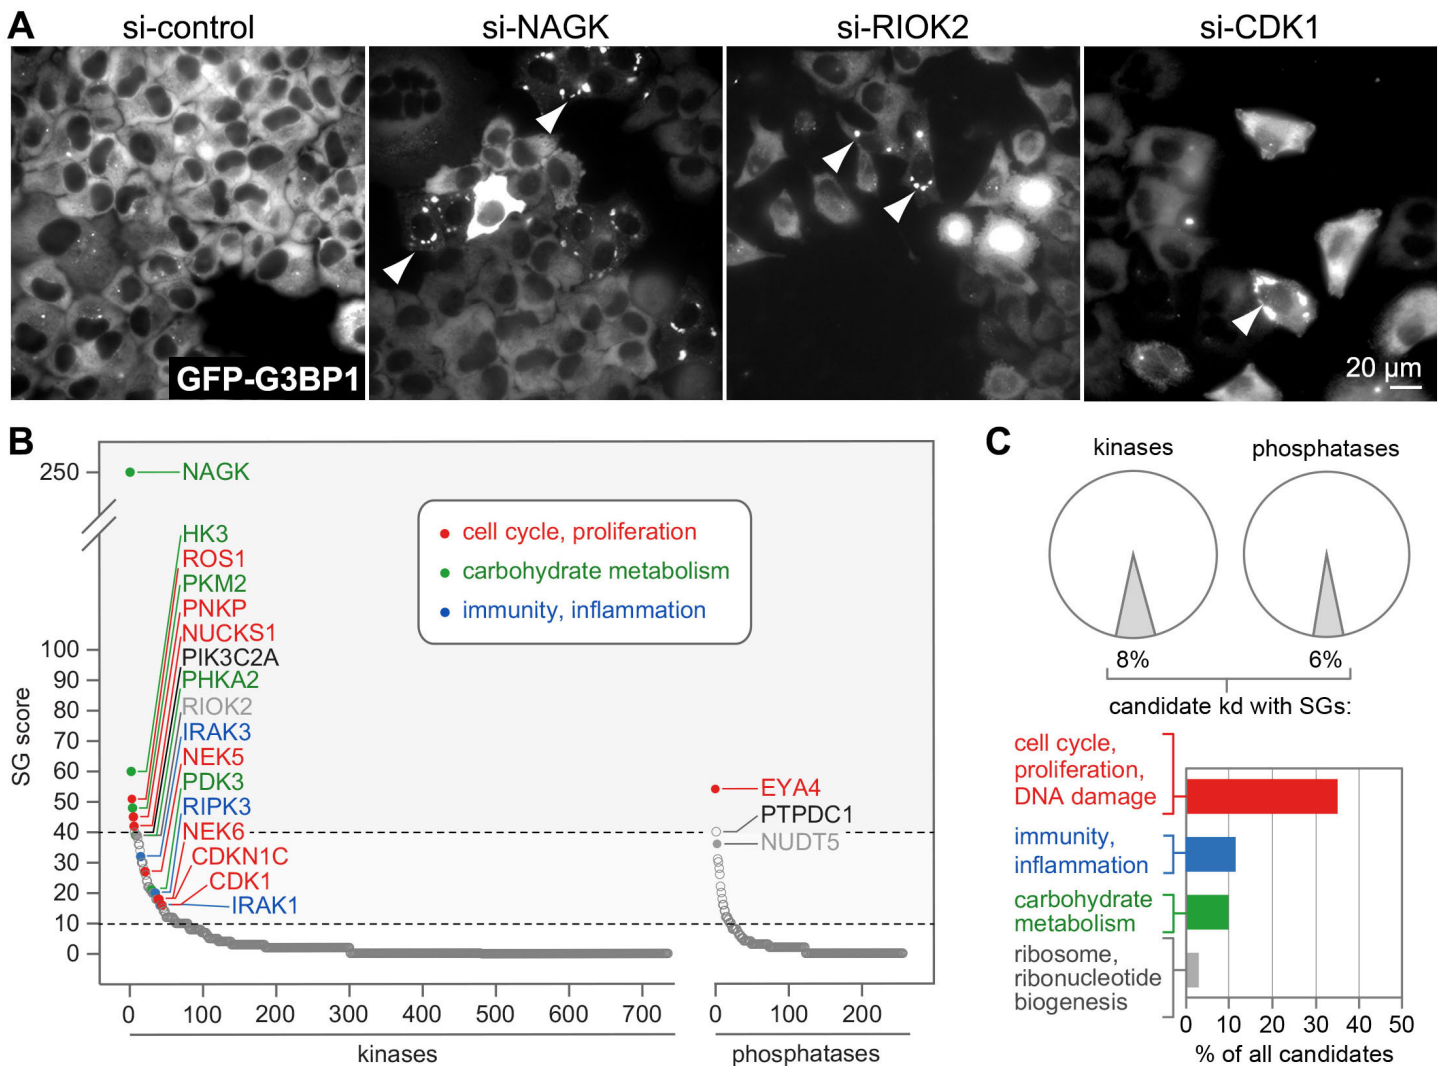

**Figure 1. SG assembly screen under regular growth conditions. (A)** The assembly of SGs was monitored in HeLa cells stably expressing GFP-G3BP1 following kd of 711 kinases and 256 phosphatases. Cells were transfected with 4 individual siRNAs per gene and 72 hours later fixed for fluorescence microscopy. Representative images of the screen are shown; arrowheads indicate SG-containing cells. **(B)** The screen was analyzed by calculating a SG score for each kinase/phosphatase kd, and the result was depicted by sorting all kds according to their SG score. Candidate kinases/phosphatases were identified by a SG score >10 (with at least 2 different siRNAs) or >40 (with 1 siRNA); some of the candidates were labeled in the graph. **(C)** The graph depicts cellular functions highly represented among the candidate kinases/phosphatases, based on functional annotation in NCBI Gene and Uniprot databases.

Figure 2, Haneke et al.

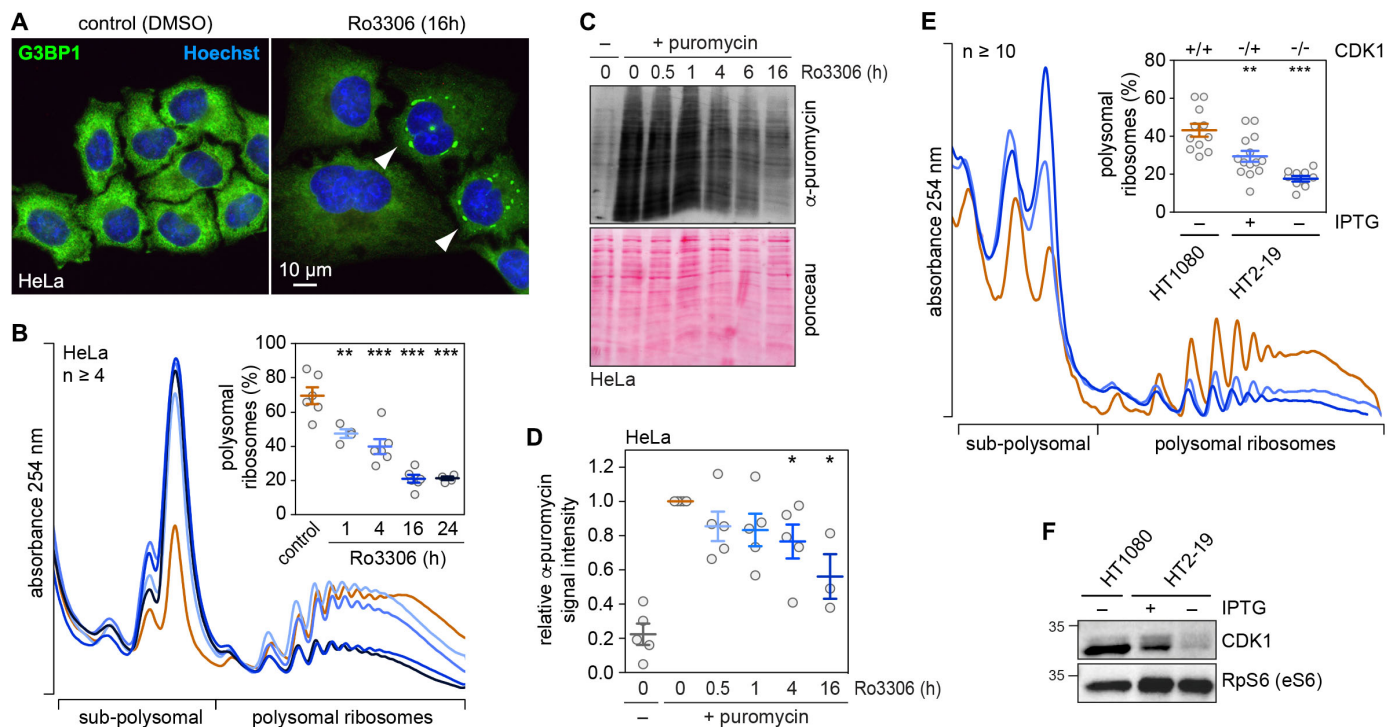

**Figure 2. Global translation suppression after pharmacological or genetic CDK1 inhibition. (A)** HeLa cells were treated either with solvent (DMSO) or the CDK1 inhibitor Ro3306 (10  $\mu$ M) for 16 h. SG formation was analyzed by IF microscopy of fixed cells stained with anti-G3BP1 antibody and Hoechst. **(B)** Polysome profiles from DMSO- or Ro3306-treated HeLa cells were recorded after sucrose density gradient centrifugation; the percentage of polysomal ribosomes is represented in the inset (average  $\pm$  SEM,  $n \geq 4$ ). Statistical significance was determined by unpaired Student's t test; \*\*,  $p \leq 0.01$ ; \*\*\*,  $p \leq 0.001$ . **(C)** Incorporation of puromycin into nascent polypeptides was analyzed by SDS-PAGE and Western blotting. Puromycin-labeled polypeptides were detected with anti-puromycin antibody; ponceau staining served as loading control. **(D)** Puromycin incorporation signal intensities were normalized to the ponceau staining and values were calculated relative to DMSO-treated control samples (average  $\pm$  SEM,  $n \geq 3$ ). Statistical significance was determined by one-sample Student's t test; \*,  $p \leq 0.05$ . **(E)** HT1080 and HT2-19 cells were seeded at sub-confluency and kept in the presence or absence of IPTG (0.2 mM) for 7 days. Polysome profiles were recorded; the percentage of polysomal ribosomes is represented in the inset (average  $\pm$  SEM,  $n \geq 10$ ). Statistical significance was determined by unpaired Student's t test; \*\*,  $p \leq 0.01$ ; \*\*\*,  $p \leq 0.001$ . **(F)** CDK1 expression in HT1080 and HT2-19 cells was assessed by Western blot analysis; RPS6 levels served as loading control.

Figure 3, Haneke et al.

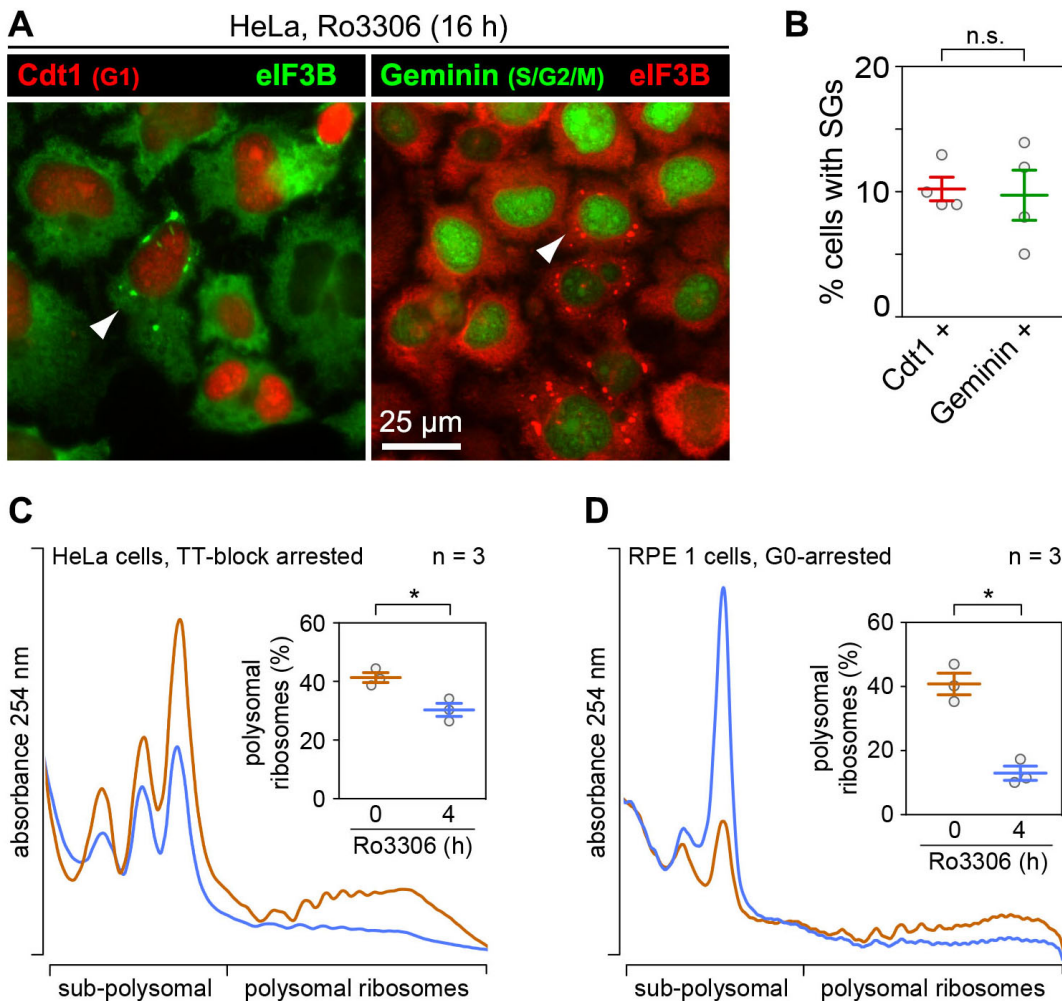

Figure 3. **Cell cycle phase-independent translation suppression upon CDK1 inhibition.** (A) HeLa FUCCI cells were treated with Ro3306 (10  $\mu$ M) for 16 h, fixed and analyzed for SG formation by IF microscopy upon staining with anti-eIF3B antibody. HeLa cells stably expressing Kusabira-Orange-Cdt1 (marker for G1- and early S-phase) were used in the left panel; HeLa cells stably expressing mVenus-Geminin (marker for S-, G2- and M-phase) were used in the right panel. (B) Quantification of the percentage of SG-containing cells in Kusabira-Orange-Cdt1-positive (left panel) or mVenus-Geminin-positive cells (right panel, n = 4). (C) HeLa cells were arrested in G1 phase by a double thymidine block (TT) and, without release from the block, treated either with solvent (DMSO) or Ro3306 (10  $\mu$ M) for 4 h. Polysome profiles were recorded; the percentage of polysomal ribosomes is represented in the inset (average  $\pm$  SEM, n = 3). (D) RPE-1 cells were serum-starved for 48 h and subsequently treated with DMSO or Ro3306 (10  $\mu$ M) for 4 h. Polysome profiles were recorded; the percentage of polysomal ribosomes is represented in the inset (average  $\pm$  SEM, n = 3). In (B-D), statistical significance was determined by paired Student's t test; \*, p  $\leq$  0.05.

Figure 4, Haneke et al.

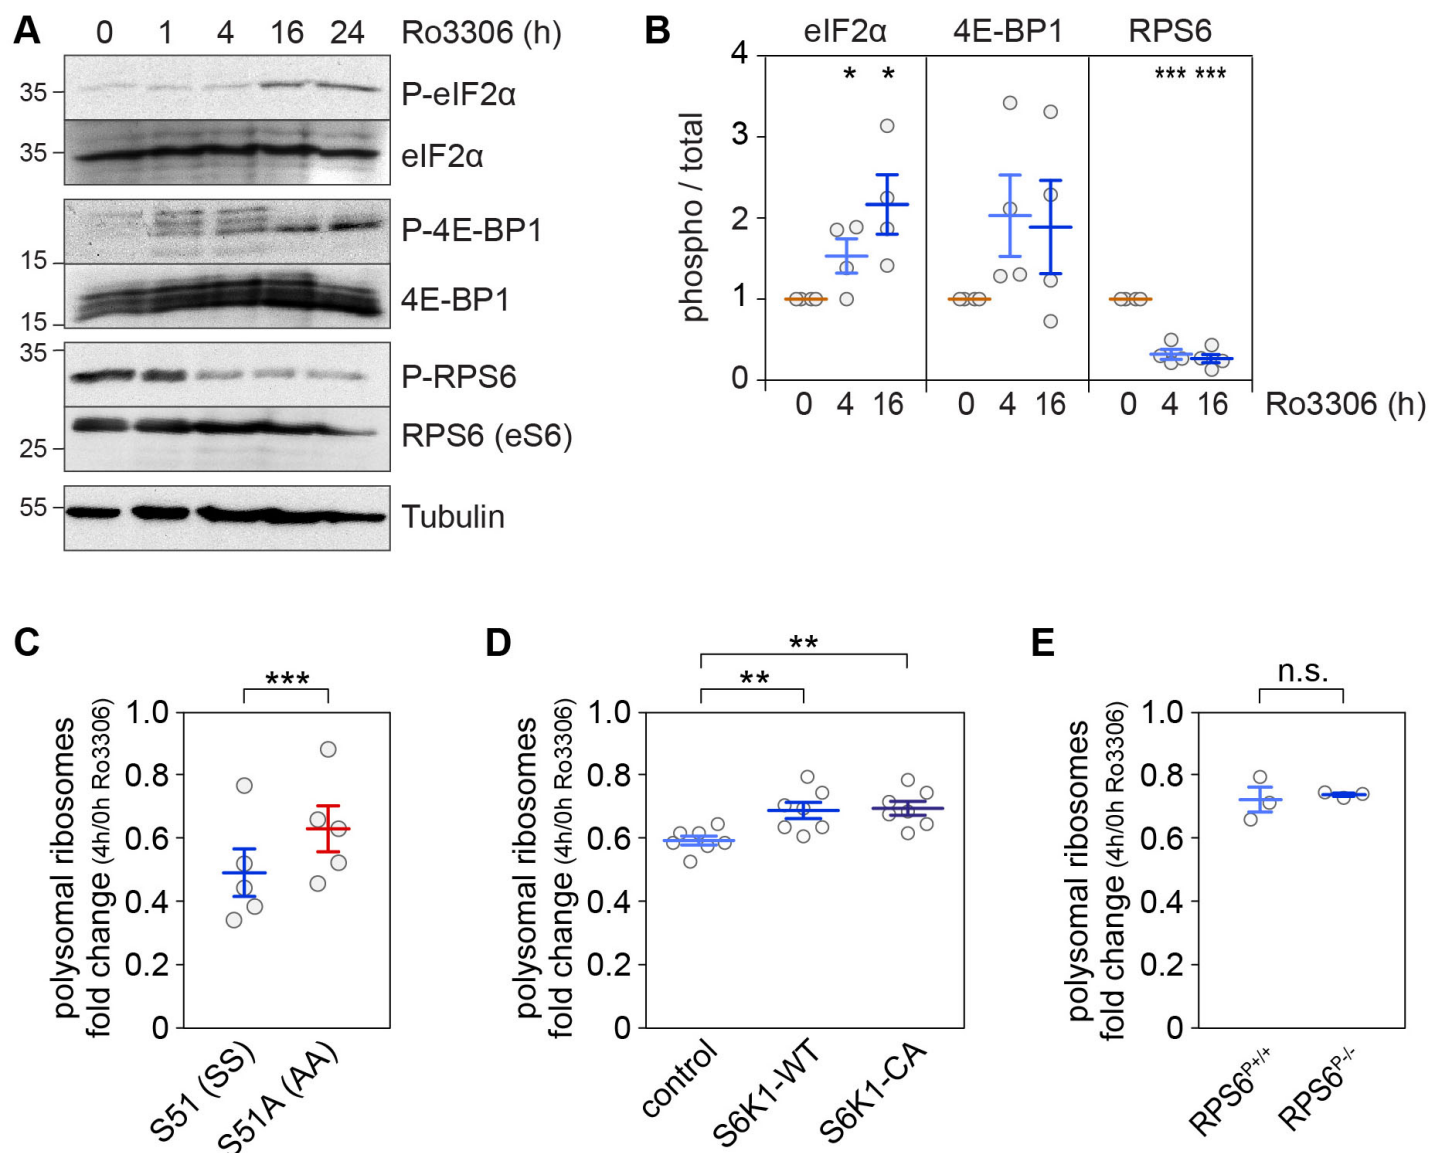

Figure 4. **Pathways signaling translational control downstream of CDK1i.** **(A)** Protein lysates were prepared from HeLa cells treated with solvent (DMSO, 24 h) or Ro3306 (10  $\mu$ M, 1–24 h), and the phosphorylation status of eIF2 $\alpha$  (S51), RPS6 (eS6) (S235/S236) and 4E-BP1 (T37/T46) were analyzed by Western blot analysis. **(B)** The phosphorylation level of eIF2 $\alpha$  (S51), RPS6 (S235/S236) and 4E-BP1 (T37/T46) was quantified from Western blot analyses as shown in (A) (average  $\pm$  SEM, n = 4). Statistical significance was determined by one-sample Student's t test; \*, p  $\leq$  0.05; \*\*\*, p  $\leq$  0.001. **(C)** The fold-change in polysomal ribosomes (4 h Ro3306 / DMSO control) was calculated based on polysome profiles recorded from eIF2 $\alpha$  WT S51 (SS) and phosphodeficient S51A (AA) MEFs. **(D)** The fold-change in polysomal ribosomes was determined as in (C) from HeLa cells (control), HeLa cells overexpressing HA-S6K1-WT and HeLa cells overexpressing constitutively active HA-S6K1-CA. **(E)** The fold-change in polysomal ribosomes was determined as in (C) from RPS6 WT (RPS6<sup>P+/+</sup>) and RPS6 phosphodeficient S235A, S236A, S240A, S244A, S247A (RPS6<sup>P-/-</sup>) MEFs. In (C–E), statistical significance was determined by paired Student's t test; \*\*, p  $\leq$  0.01; \*\*\*, p  $\leq$  0.001.

Figure 5, Haneke et al.

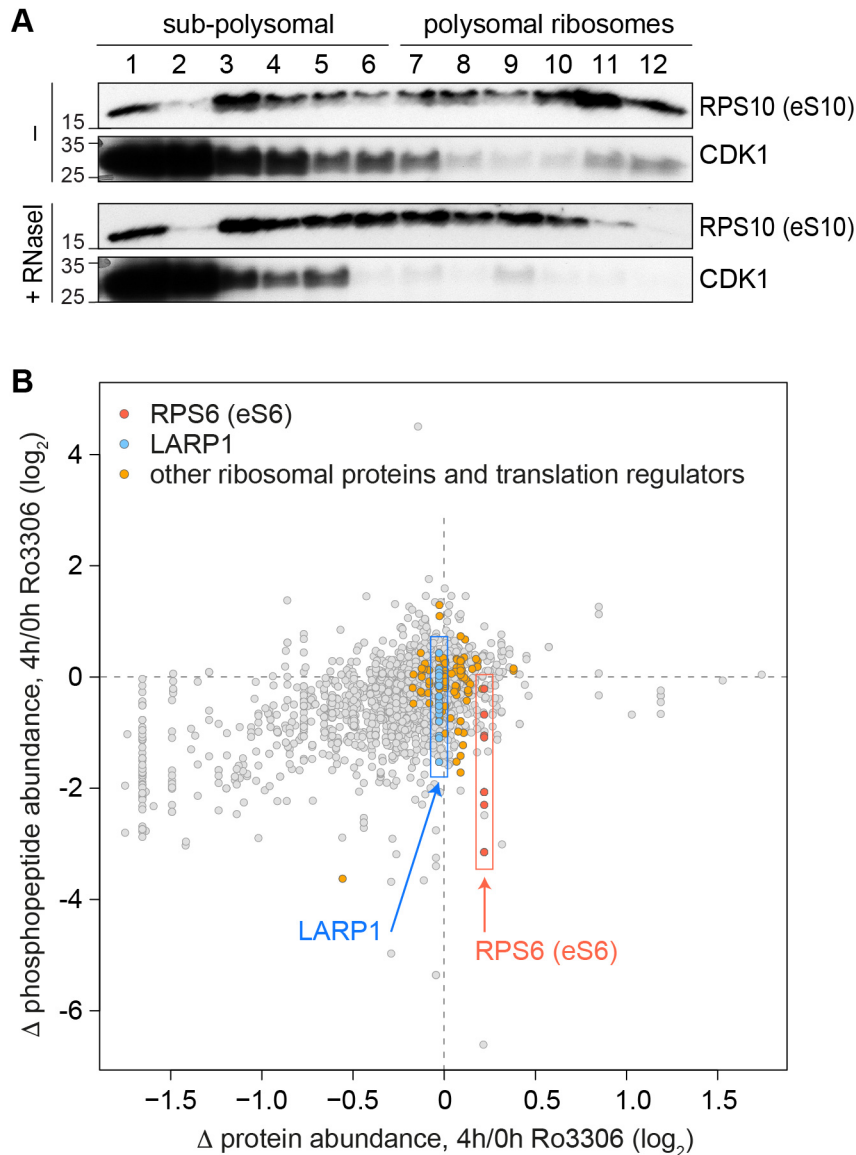

Figure 5. **CDK1-dependent phosphorylation events associated with ribosomes.** **(A)** HeLa cell lysates, either untreated or subjected to RNase I digestion, were fractionated following sucrose density gradient centrifugation. Association of RPS10 and CDK1 with the different fractions was monitored by Western blot analysis. **(B)** For phosphoproteomics of ribosomal fractions, HeLa cells were SILAC-labeled and either treated with DMSO or Ro3306 for 4 h. After lysis and disassembly of polysomes in low magnesium buffer, samples were mixed, and ribosomal fractions obtained by sucrose density centrifugation were subjected to phosphopeptide enrichment using PhosSelect iron affinity gel IMAC beads and analyzed by mass spectrometry followed by MaxQuant analysis. For all phosphopeptides detected under both conditions, the ratio ( $\Delta$  phosphopeptide abundance, 4h/0h Ro3306) was plotted against the ratio of the corresponding total protein ( $\Delta$  protein abundance, 4h/0h Ro3306). Phosphopeptides derived from LARP1 (blue), RPS6 (red) and other translation regulators (orange) are color-coded.

Figure 6, Haneke et al.

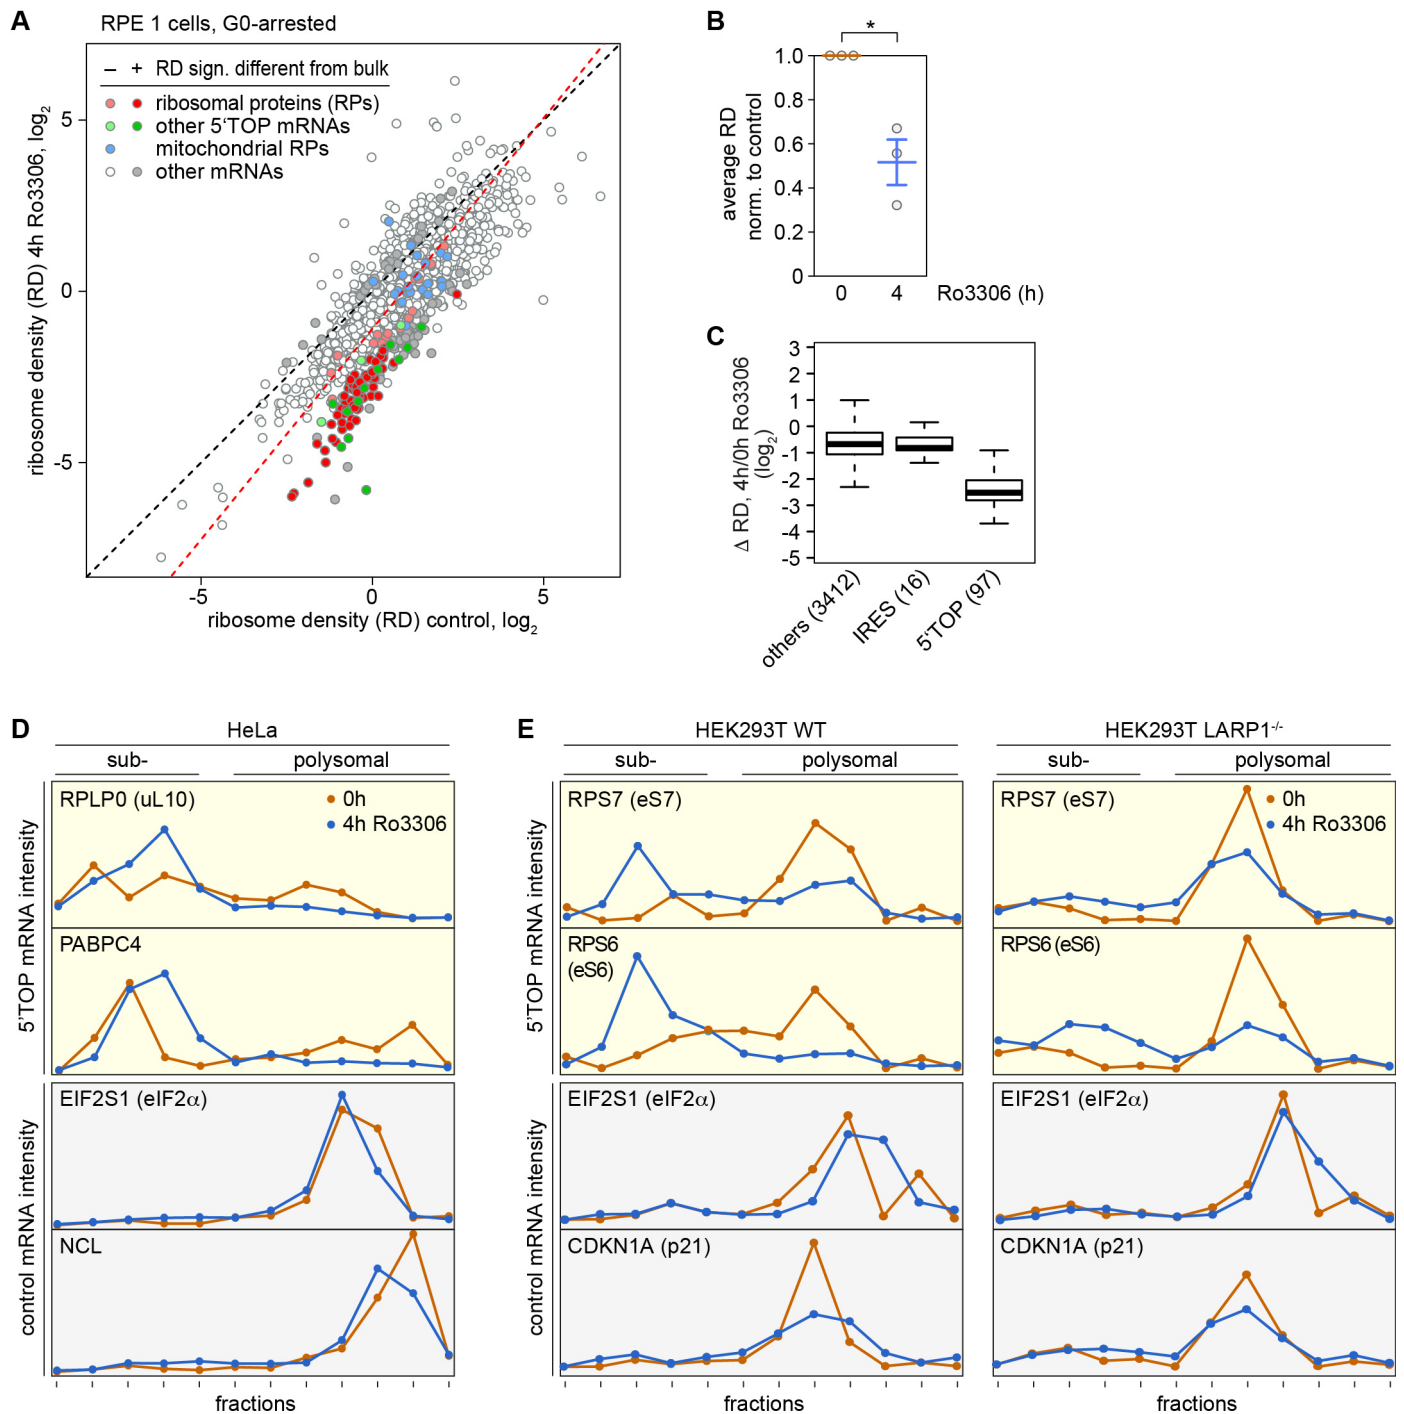

**Figure 6. LARP1-dependent suppression of 5'TOP mRNA translation upon CDK1i.** (A) For Ribo-Seq analysis, RPE1 cells were serum-starved for 48 h followed by a 4 h treatment with DMSO or Ro3306 (10  $\mu$ M). Equal amounts of a yeast lysate was spiked into the DMSO- and Ro3306-treated samples. Ribosome densities (# ribosome footprints / # ORF-spanning reads in input RNA) were calculated after normalization to the yeast spike-in footprints from  $n = 3$  biological repeat experiments. (B) Based on the Ribo-Seq analysis in (A), the average ribosome density was calculated after normalization to the yeast spike-in. Statistical significance was determined by one-sample Student's t test; \*,  $p \leq 0.05$ . (C) Based on the Ribo-Seq analysis in (A), the fold-change in ribosome density ( $\Delta$  RD) was calculated for IRES-containing mRNAs, 5'TOP mRNAs and all other mRNAs. (D) Polysome association of 5'TOP (RPLP0 and PABPC4) and ORF size-matched non-TOP (EIF2S1 and NCL) mRNAs was analyzed by polysome fractionation and subsequent qPCR analysis from DMSO- or Ro3306-treated (10  $\mu$ M, 4 h) HeLa cells. (E) Polysome association of 5'TOP (RPS6 and RPS7) and ORF size-matched non-TOP (EIF2S1, CDKN1A) mRNAs was analyzed by polysome fractionation and subsequent qPCR analysis from DMSO- or Ro3306-treated (10  $\mu$ M, 4 h) HEK293T WT or LARP1<sup>-/-</sup> cells.
